# Supplementary material for: The charge transport properties of dicyanomethylene-functionalised violanthrone derivatives
Source: publisher site journal article supplement (doi:10.3762/bjoc.20.244), 2024-11-13
Supplement: Additional file 1 [file 1860-5397-20-244-S1.pdf]

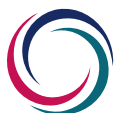

## Supporting Information

for

### **The charge transport properties of dicyanomethylene-functionalised violanthrone derivatives**

Sondos A. J. Almahmoud, Joseph Cameron, Dylan Wilkinson, Michele Cariello, Claire Wilson, Alan A. Wiles, Peter J. Skabara and Graeme Cooke

*Beilstein J. Org. Chem.* **2024**, *20*, 2921–2930. [doi:10.3762/bjoc.20.244](https://doi.org/10.3762/bjoc.20.244)

### **NMR spectra of compounds, crystallographic information and OFET plots**

|                                   | Table of contents                                                                                                                                                                                        | Page    |
|-----------------------------------|----------------------------------------------------------------------------------------------------------------------------------------------------------------------------------------------------------|---------|
| <b>1 Materials</b>                |                                                                                                                                                                                                          | S2      |
| <b>2 NMR Spectra</b>              |                                                                                                                                                                                                          | S3–S8   |
|                                   | <sup>1</sup> H NMR of compound <b>2a</b>                                                                                                                                                                 | S3      |
|                                   | <sup>13</sup> C NMR of compound <b>2a</b>                                                                                                                                                                | S3      |
|                                   | <sup>1</sup> H NMR of compound <b>2b</b>                                                                                                                                                                 | S4      |
|                                   | <sup>13</sup> C NMR of compound <b>2b</b>                                                                                                                                                                | S4      |
|                                   | <sup>1</sup> H NMR of compound <b>2c</b>                                                                                                                                                                 | S5      |
|                                   | <sup>13</sup> C NMR of compound <b>2c</b>                                                                                                                                                                | S5      |
|                                   | <sup>1</sup> H NMR of compound <b>3a</b>                                                                                                                                                                 | S6      |
|                                   | <sup>13</sup> C NMR of compound <b>3a</b>                                                                                                                                                                | S6      |
|                                   | <sup>1</sup> H NMR of compound <b>3b</b>                                                                                                                                                                 | S7      |
|                                   | <sup>13</sup> C NMR of compound <b>3b</b>                                                                                                                                                                | S7      |
|                                   | <sup>1</sup> H NMR of compound <b>3c</b>                                                                                                                                                                 | S8      |
|                                   | <sup>13</sup> C NMR of compound <b>3c</b>                                                                                                                                                                | S8      |
| <b>3 Crystallographic studies</b> |                                                                                                                                                                                                          | S9–S23  |
| Figure S1                         | View of the crystal structure of <b>3b</b> , displacement ellipsoids drawn at 50% probability level, H-atoms omitted for clarity. Selected atom labels given for torsion angles in Table S1.             | S9      |
| Table S1                          | Selected torsion angles for <b>3b</b> and comparison with calculated values for Va-CN (OMe substituent) from Zhu et al. <sup>1</sup>                                                                     | S10     |
| Figure S2                         | Packing diagram of the structure of <b>3b</b> , viewed along the <i>b</i> -axis, showing the stacks of molecules linked by $\pi$ – $\pi$ interactions and the alternating aromatic and aliphatic layers. | S10     |
| Figure S3                         | View showing $\pi$ – $\pi$ stacking in <b>3b</b> ; two distinct $\pi$ – $\pi$ interactions between parallel rings with centroid-centroid distances of 3.65 and 3.98 Å                                    | S11     |
| <b>4 OFET Plots</b>               |                                                                                                                                                                                                          | S24–S25 |
| Figure S4:                        | (a) Output and (b) transfer characteristics ( $V_{DS} = -70$ V) of OFET fabricated using <b>3b</b> layer. Channel width = 1 cm, channel length = 20 $\mu$ m                                              | S24     |
| Figure S5:                        | (a) Output and (b) transfer characteristics ( $V_{DS} = -70$ V) of OFET fabricated using <b>2b</b> layer. Channel width = 1 cm, channel length = 10 $\mu$ m.                                             | S24     |
| Figure S6:                        | (a) Output and (b) transfer characteristics ( $V_{DS} = -70$ V) of OFET fabricated using <b>2a</b> layer. Channel width = 1 cm, channel length = 20 $\mu$ m                                              | S24     |
| Figure S7:                        | (a) Output and (b) transfer characteristics ( $V_{DS} = -70$ V) of OFET fabricated using <b>3c</b> layer. Channel width = 1 cm, channel length = 20 $\mu$ m                                              | S25     |
| Figure S8:                        | (a) Output and (b) transfer characteristics ( $V_{DS} = -70$ V) of OFET fabricated using <b>3a</b> layer. Channel width = 1 cm, channel length = 20 $\mu$ m                                              | S25     |

<sup>1</sup> B. Liu, D. Fan, Q. Zhang, Y. Chen and W. Zhu, *Frontiers of Chemistry in China*, 2010, 5, 200-207.

## 1 Materials and characterisation procedures

All reagents were purchased from either Acros<sup>®</sup>, Alfa Aesar<sup>®</sup>, Fisher Scientific<sup>®</sup> Fluorochem<sup>®</sup>, Sigma Aldrich<sup>®</sup>, and TCI<sup>®</sup>. Column chromatography was carried out using silica gel 40–63 nm 60 Å (Sigma-Aldrich). TLCs were performed using Merck silica gel 60 covered aluminium plates F254. Dry solvents were obtained from either solvent purification system (activated alumina columns) (Pure Solv 400-5-MD) or Sigma Aldrich<sup>®</sup>. <sup>1</sup>H NMR and <sup>13</sup>C NMR spectra were recorded on a Bruker AVIII (400 MHz) spectrometer, operating at 400 MHz and 100 MHz, respectively. Mass spectra were obtained from either the mass spectrometry service at the University of Glasgow or the EPSRC UK National Mass Spectrometry Facility at Swansea University. UV–vis measurements were carried out using a Perkin Elmer Lambda 25 spectrometer and Shimadzu UV-3600 UV–vis–NIR spectrophotometer. Square wave voltammetry was recorded at room temperature under nitrogen on a CH instruments Electrochemical Workstation 440A using a three-electrode cell with a platinum (Pt) working electrode, a Pt wire counter electrode and an Ag wire pseudo reference electrode. Samples were analysed at 1.0 mM concentrations with a scan rate of 0.1 V s<sup>-1</sup> using TBAPF<sub>6</sub> (0.1 M in corresponding solvent) as the supporting electrolyte. The redox potentials are referenced to ferrocene (internal or external reference) with the Fc/Fc<sup>+</sup> redox couple adjusted to 0.0 V. For the estimations of energy levels of the analytes, the HOMO energy of ferrocene was taken as 4.80 eV. All the spectroscopic and electrochemical data were processed using Origin Pro 8.5 software suite. The single crystal diffraction data were collected by the EPSRC National Crystallography Service. Details are given in the CIF which can be obtained from the CCDC free of charge CCDC 2128169.

## 2 NMR Spectra

### <sup>1</sup>H NMR of compound 2a

SAM-333-con-full  
user Sondos Almahmoud  
PROTON.GLA CDCl<sub>3</sub> /u sondos 11

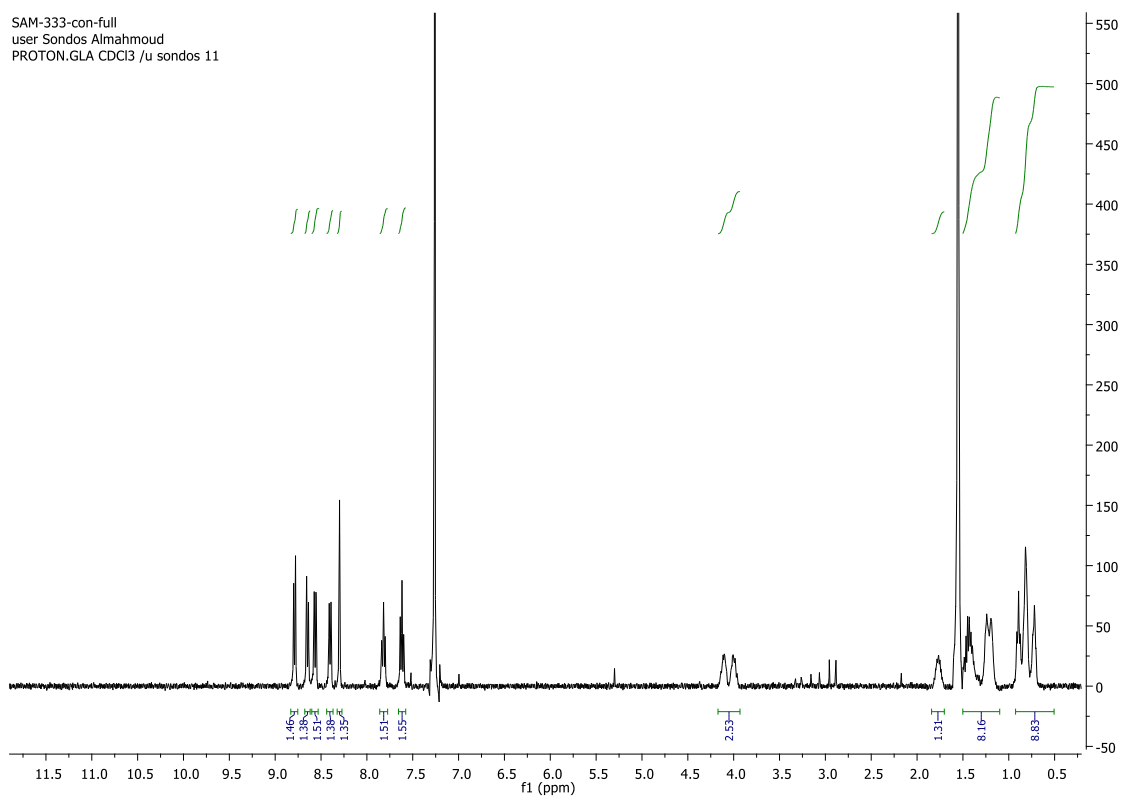

### <sup>13</sup>C NMR of compound 2a

SAM-333 c13

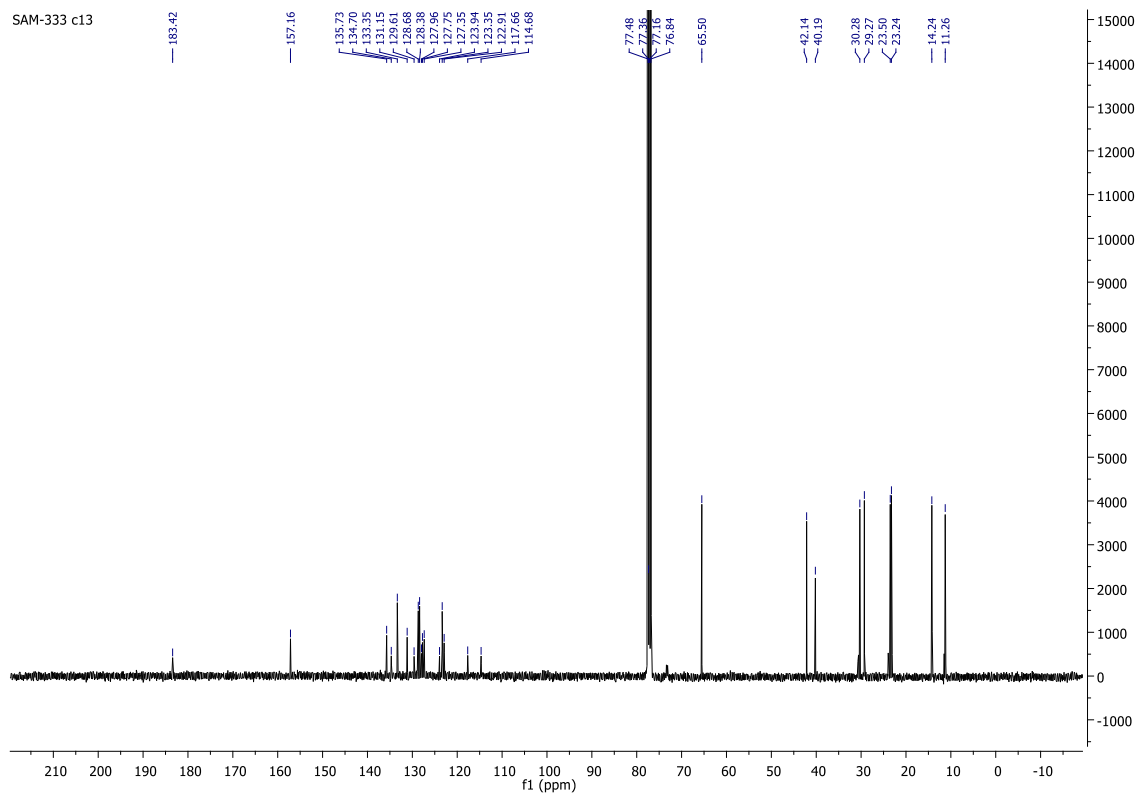

# <sup>1</sup>H NMR of compound 2b

SAM-85 precipitate  
user Sondos Almahmoud  
PROTON.GLA CDCl3 /u sondos 33

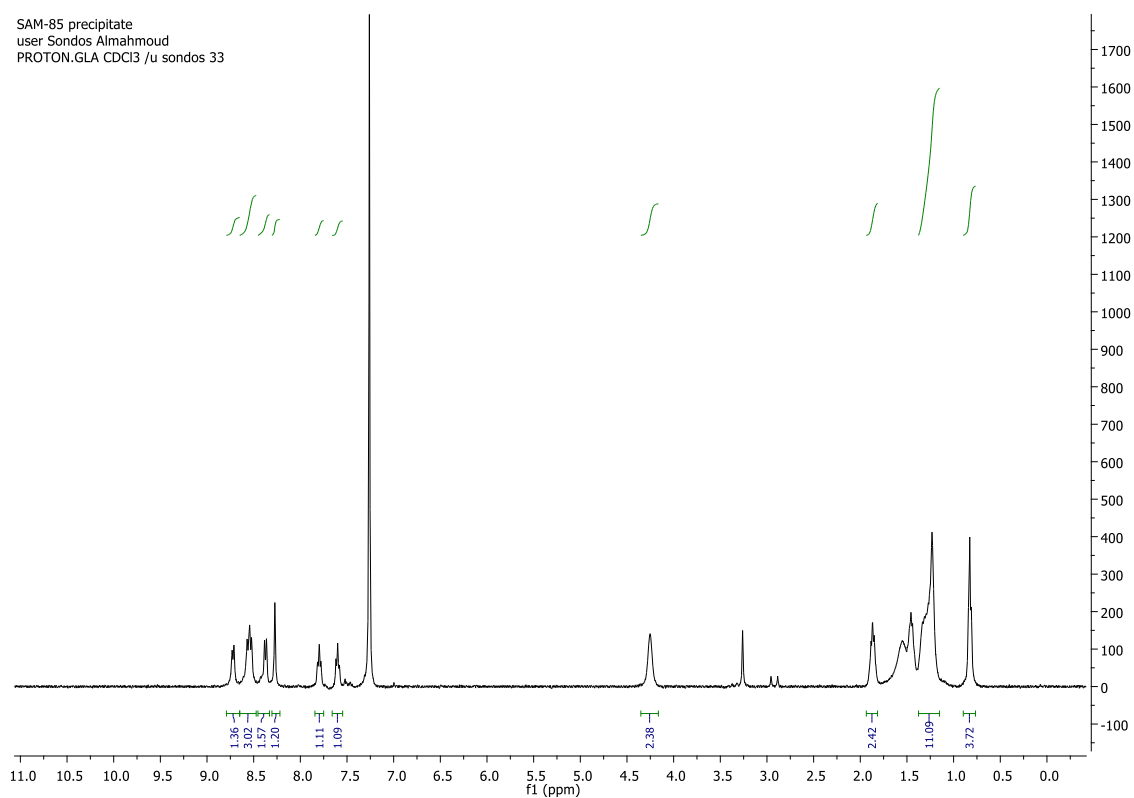

# <sup>13</sup>C NMR of compound 2b

SAM-vio full

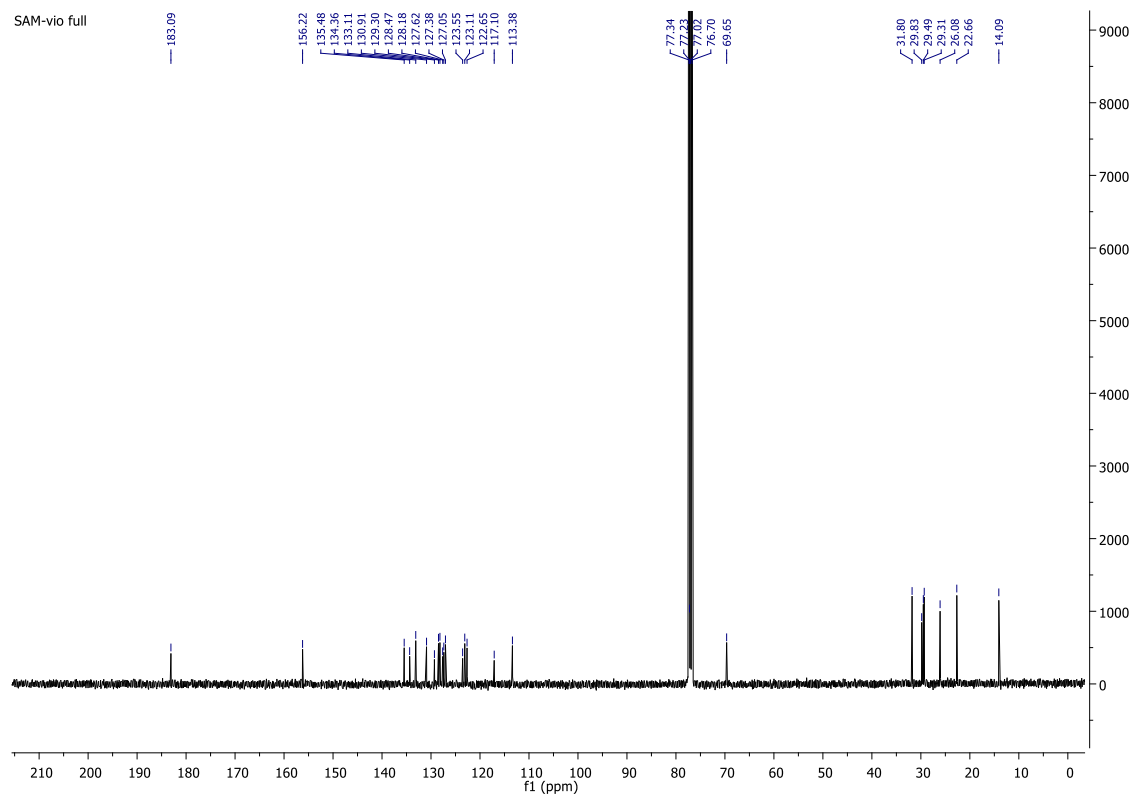

# <sup>1</sup>H NMR of compound 2c

SAM-330 full ch  
user Sondos Almahmoud  
PROTON.GLA CDCl3 /u sondos 12

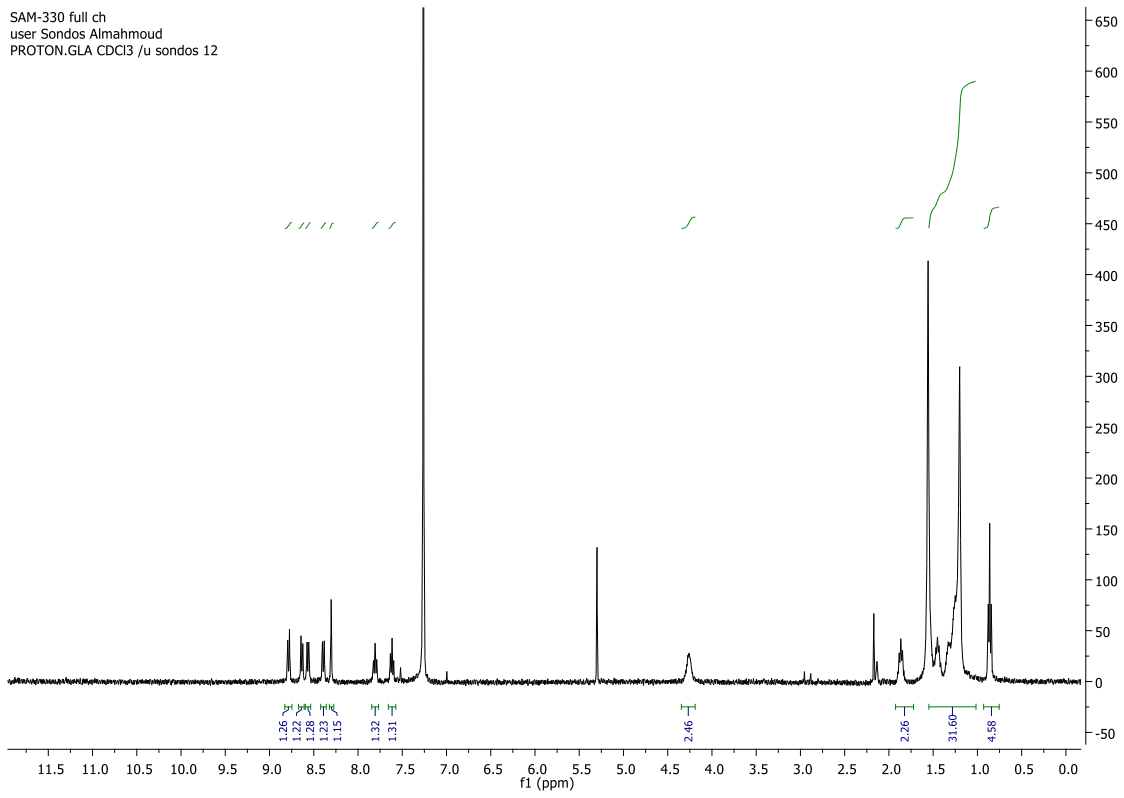

# <sup>13</sup>C NMR of compound 2c

SAM-319 full ch conc  
user Sondos Almahmoud  
C13CPD1024.GLA CDCl3 /u sondos 36

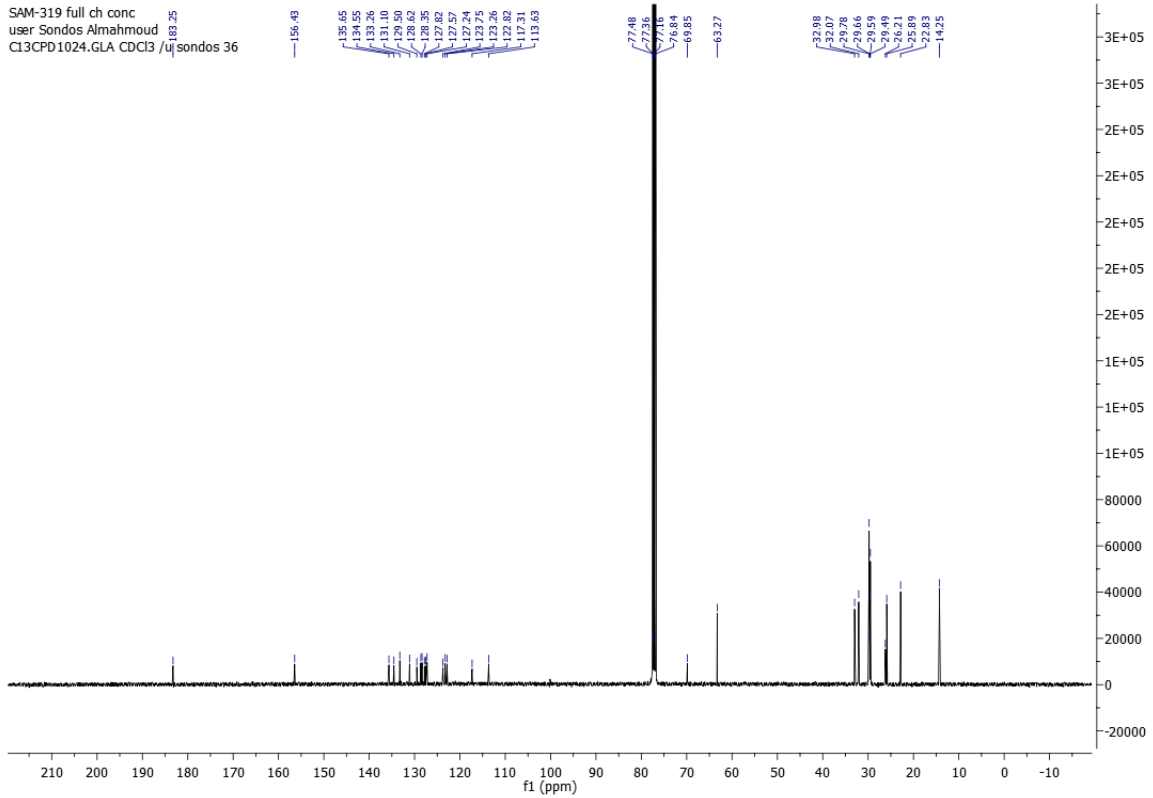

# <sup>1</sup>H NMR of compound 3a

SAM-336-con-full dh

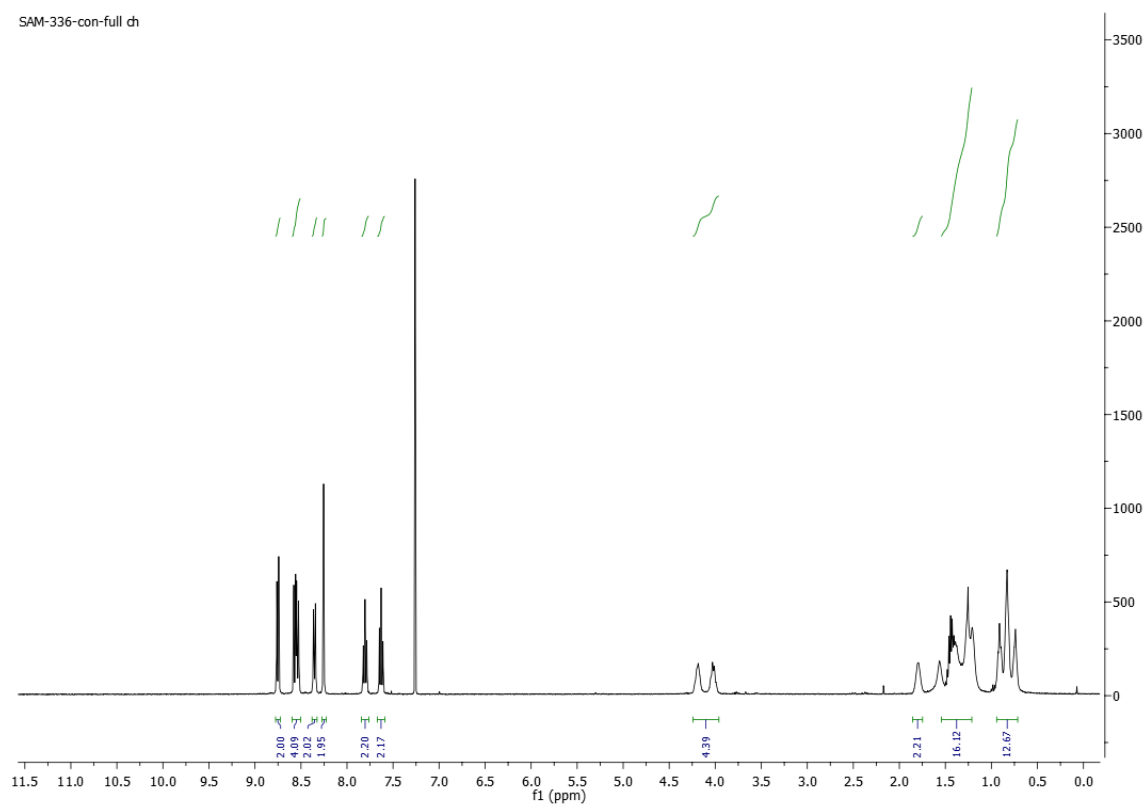

# <sup>13</sup>C NMR of compound 3a

SAM-333 c13

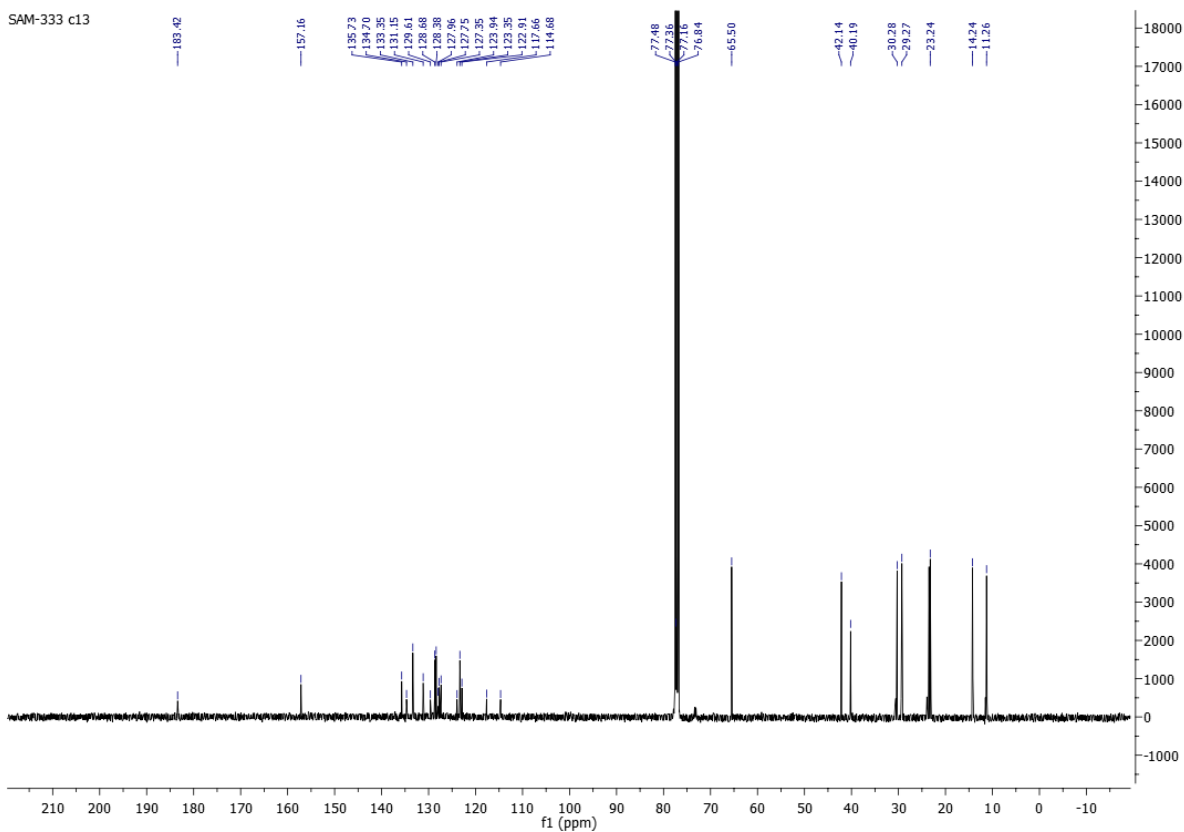

# <sup>1</sup>H NMR of compound 3b

SAM-95 full chr  
user Sondos Almahmoud  
PROTON.GLA CDCl3 /u sondos 55

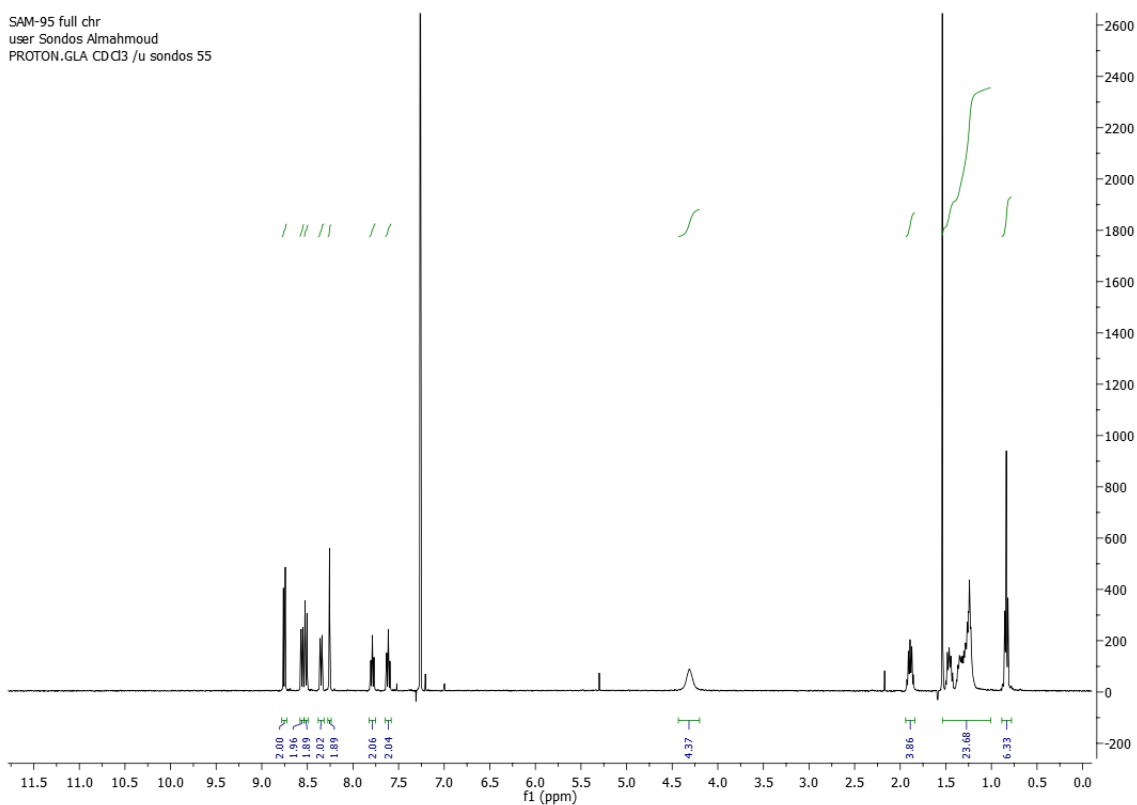

# <sup>13</sup>C NMR of compound 3b

SAM-95 full chr  
user Sondos Almahmoud  
C13CPD1024.GLA CDCl3 /u sondos 55

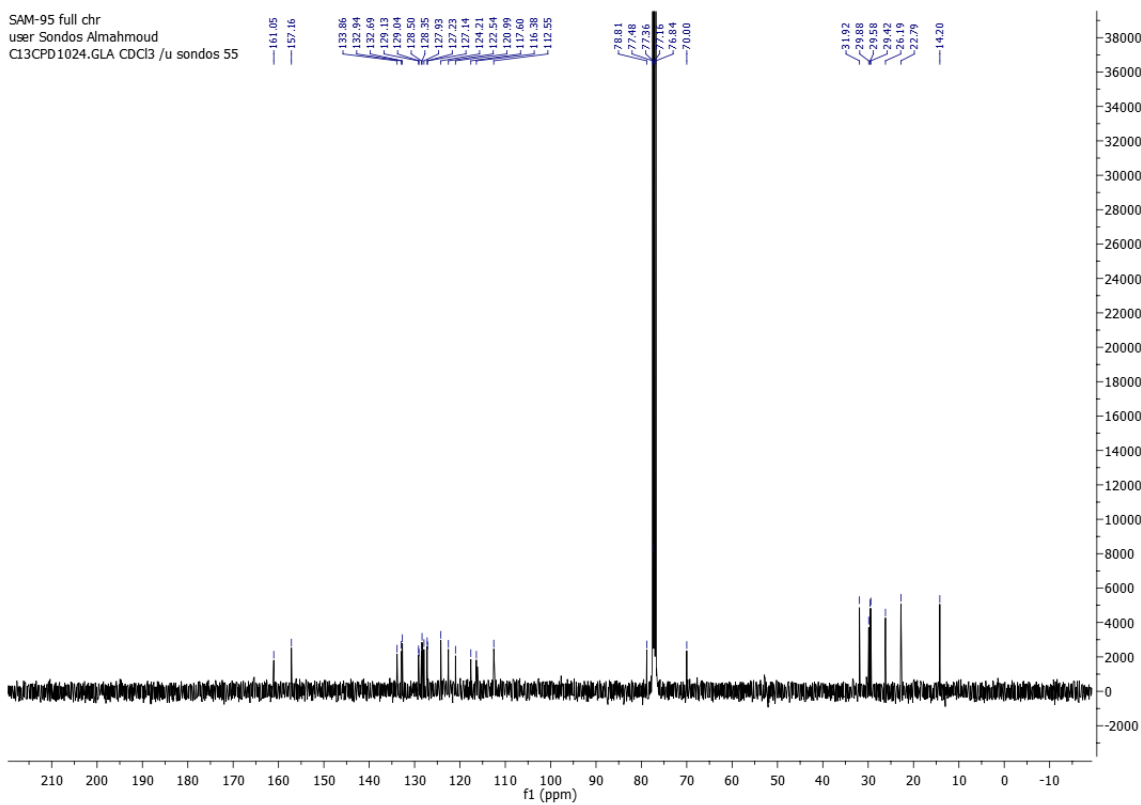



# <sup>1</sup>H NMR of compound 3c

SAM-323-con-full

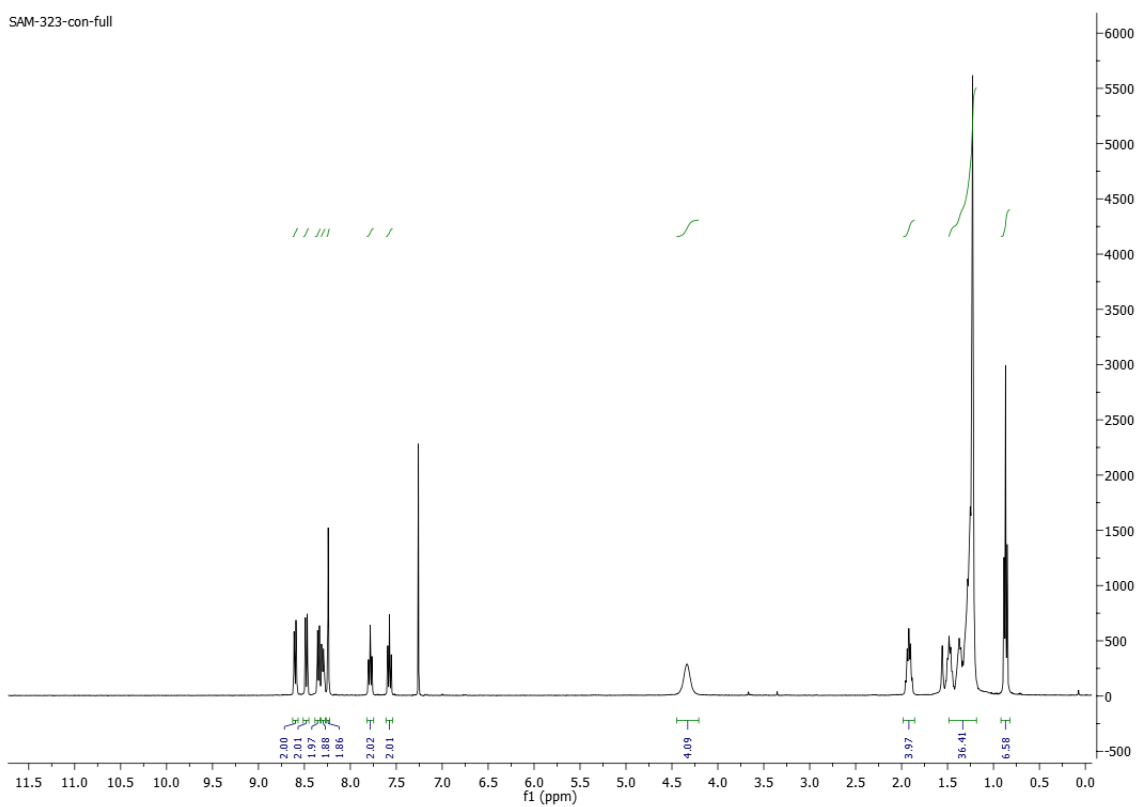

# <sup>13</sup>C NMR of compound 3c

SAM-323-con-full

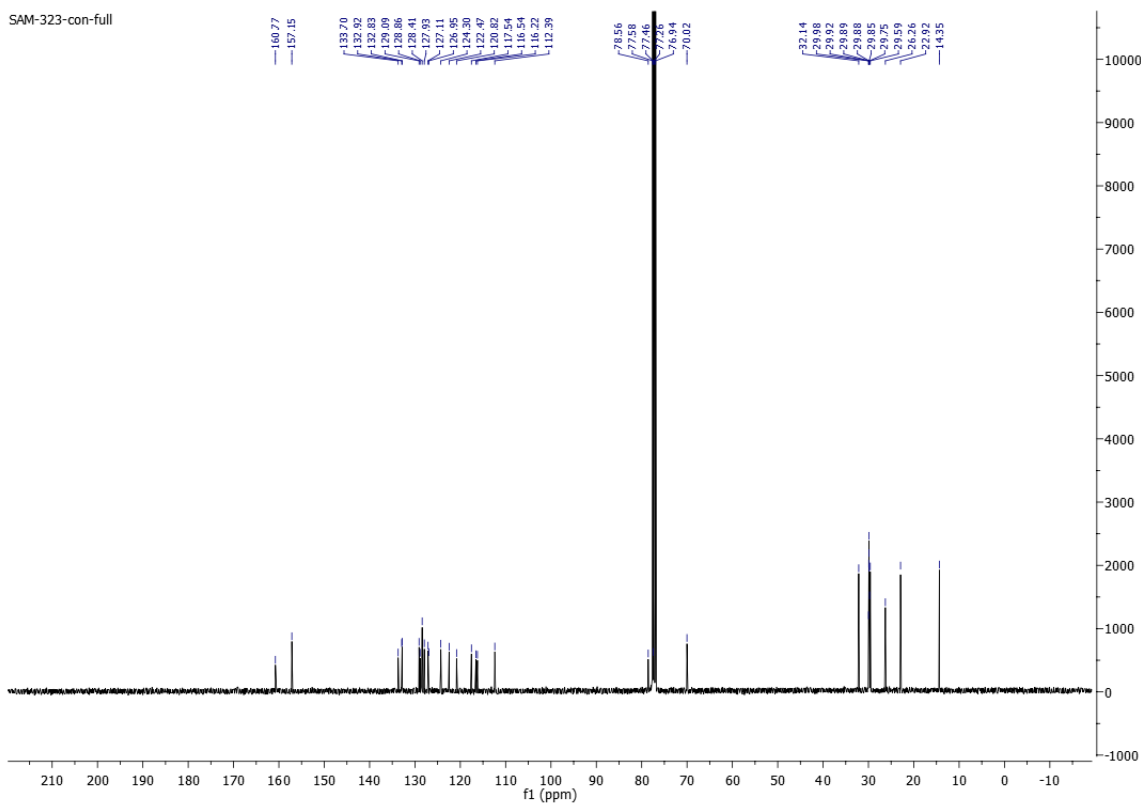

### 3 Crystallographic studies

Single crystal X-ray diffraction data for **3b** were collected by the EPSRC National Crystallography Service using a ROD, Synergy Custom system, HyPix diffractometer with Cu K $\alpha$  radiation,  $\lambda = 1.54178 \text{ \AA}$ . Data were collected and processed using CrysAlis PRO 1.171.39.30d (Rigaku OD, 2015). The structure was solved using SHELXT 2018/2 (Sheldrick, 2015a) and refined using SHELXL 2018/3 (Sheldrick, 2015b) within Olex2 1.3 (Dolomanov et al., 2009). Non-H atoms were refined with anisotropic atomic displacement parameters (ADPs) and H-atoms were placed in geometrically calculated positions and included as part of a riding model except the Me H-atoms which were included as a rigid rotor.

C<sub>56</sub>H<sub>48</sub>N<sub>4</sub>O<sub>2</sub>,  $M_r = 808.98$ , Triclinic,  $a = 10.8068 (8)$ ,  $b = 12.8088 (6)$ ,  $c = 16.3148 (14) \text{ \AA}$ ,  $\alpha = 93.100 (6)$ ,  $\beta = 104.721 (7)$ ,  $\gamma = 103.717 (5)^\circ$ ,  $V = 2106.1 (3) \text{ \AA}^3$ ,  $T = 100 \text{ K}$ , space group  $P-1$  (no. 2),  $Z = 2$ , brown, plate-like crystal  $0.23 \times 0.12 \times 0.01 \text{ mm}$ . 26881 reflections measured, 7857 unique ( $R_{\text{int}} = 0.099$ ), which were used in all calculations. The final  $R[F^2 > 2\sigma(F^2)]$  4956 reflections = 0.125,  $wR(F^2) = 0.398$ , 561 parameters.

CCDC 2128169 contains the supplementary crystallographic data for this paper. These data can be obtained free of charge from The Cambridge Crystallographic Data Centre via [www.ccdc.cam.ac.uk/structure](http://www.ccdc.cam.ac.uk/structure)

Dolomanov, O. V., Bourhis, L. J., Gildea, R. J., Howard, J. A. K. & Puschmann, H. (2009). *J. Appl. Cryst.* **42**, 339–341.

Sheldrick, G. M. (2015a). *Acta Cryst.* **A71**, 3–8.

Sheldrick, G. M. (2015b). *Acta Cryst.* **C71**, 3–8.

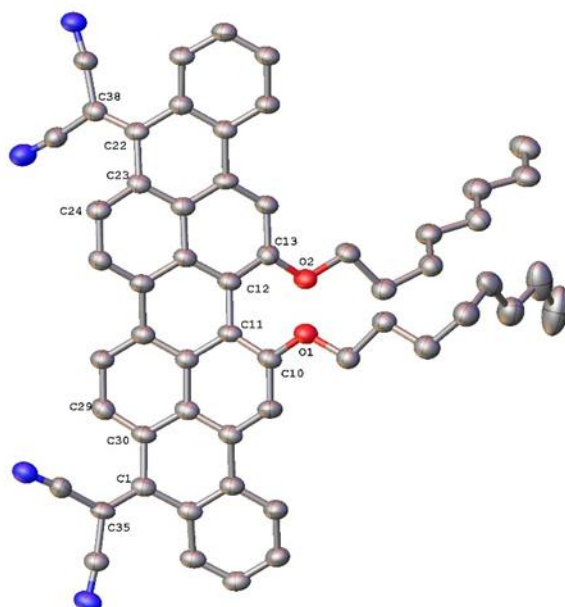

**Figure S1:** View of the crystal structure of **3b**, displacement ellipsoids drawn at 50% probability level, H-atoms omitted for clarity. Selected atom labels given for torsion angles in Table S1.

**Table S1:** Selected torsion angles for **3b** and comparison with calculated values for **Va-CN** (OMe substituent) from Zhu et al.<sup>2</sup>

| Torsion angle (°) | Experimental crystal structure <b>3b</b> | Va-CN Zhu et al |
|-------------------|------------------------------------------|-----------------|
| C10—C11—C12—C13   | 33.3 (8)                                 | 33.57           |
| C11—C12—C13—O2    | 13.1 (8)                                 | 11.14           |
| O1—C10—C11—C12    | 15.1 (8)                                 | 11.12           |
| C25—C26—C27—C28   | 19.4 (8)                                 | 12.04           |
| C35—C1—C30—C29    | -26.9 (8)                                | 34.23           |
| C38—C22—C23—C24   | -29.0 (7)                                | 34.21           |

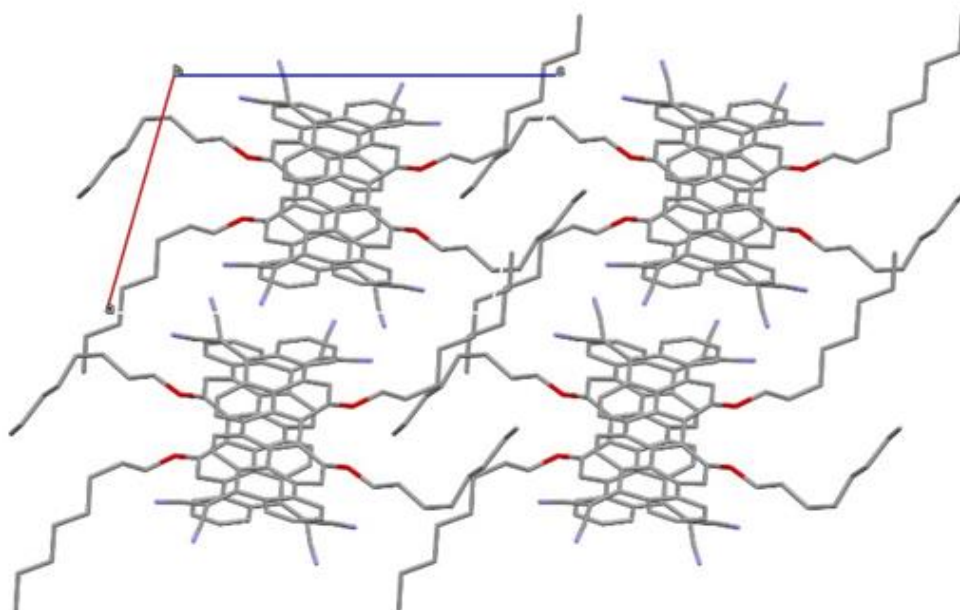

**Figure S2:** Packing diagram of the structure of **3b**, viewed along the *b*-axis, showing the stacks of molecules linked by  $\pi$ - $\pi$  interactions and the alternating aromatic and aliphatic layers.

<sup>2</sup> B. Liu, D. Fan, Q. Zhang, Y. Chen and W. Zhu, *Frontiers of Chemistry in China*, 2010, 5, 200-207.

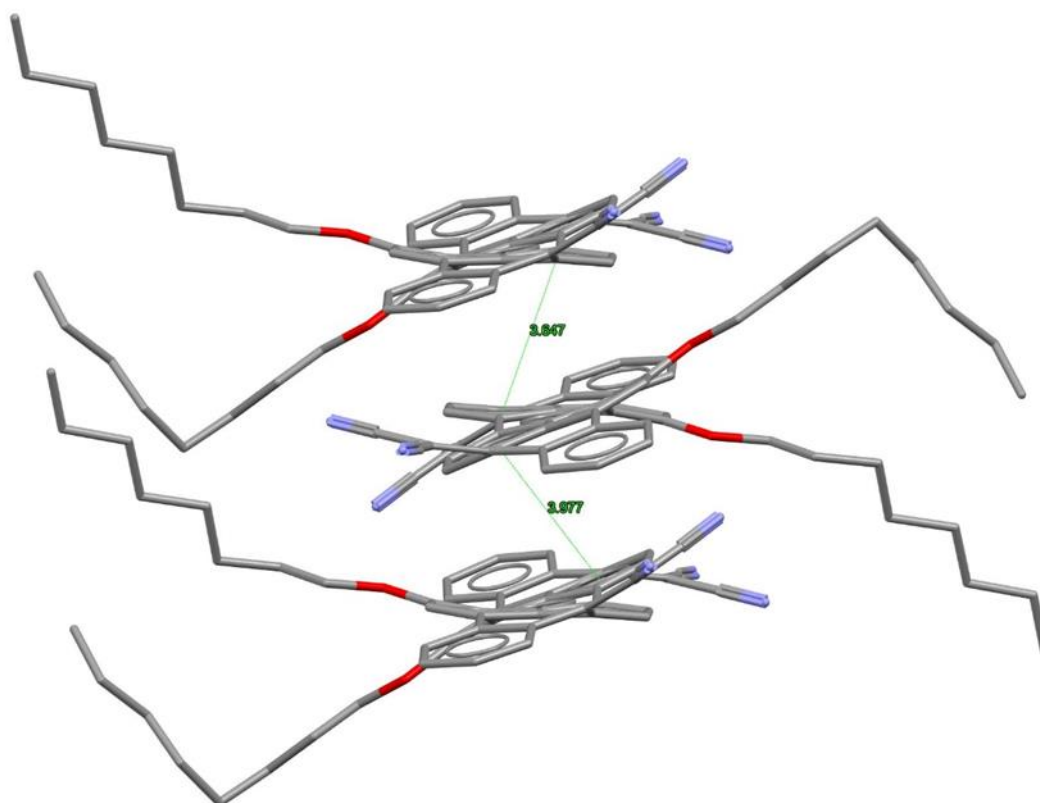

**Figure S3:** View showing  $\pi$ - $\pi$  stacking in **3b**; two distinct  $\pi$ - $\pi$  interactions between parallel rings with centroid-centroid distances of 3.65 and 3.98 Å.

#### Crystal data

|                                |                                                         |
|--------------------------------|---------------------------------------------------------|
| $C_{56}H_{48}N_4O_2$           | $Z = 2$                                                 |
| $M_r = 808.98$                 | $F(000) = 856$                                          |
| Triclinic, $P\bar{1}$          | $D_x = 1.276 \text{ Mg m}^{-3}$                         |
| $a = 10.8068 (8) \text{ \AA}$  | Cu $K\alpha$ radiation, $\lambda = 1.54178 \text{ \AA}$ |
| $b = 12.8088 (6) \text{ \AA}$  | Cell parameters from 6908 reflections                   |
| $c = 16.3148 (14) \text{ \AA}$ | $\theta = 2.8\text{--}75.3^\circ$                       |
| $\alpha = 93.100 (6)^\circ$    | $\mu = 0.61 \text{ mm}^{-1}$                            |
| $\beta = 104.721 (7)^\circ$    | $T = 100 \text{ K}$                                     |
| $\gamma = 103.717 (5)^\circ$   | Plate, brown                                            |
| $V = 2106.1 (3) \text{ \AA}^3$ | $0.23 \times 0.12 \times 0.01 \text{ mm}$               |

## Data collection

|                                                                                                                                                                                                                   |                                                                        |
|-------------------------------------------------------------------------------------------------------------------------------------------------------------------------------------------------------------------|------------------------------------------------------------------------|
| ROD, Synergy Custom system, HyPix diffractometer                                                                                                                                                                  | 7857 independent reflections                                           |
| Radiation source: Rotating-anode X-ray tube, Rigaku (Cu) X-ray Source                                                                                                                                             | 4956 reflections with $I > 2\sigma(I)$                                 |
| Mirror monochromator                                                                                                                                                                                              | $R_{\text{int}} = 0.099$                                               |
| Detector resolution: 10.0000 pixels $\text{mm}^{-1}$                                                                                                                                                              | $\theta_{\text{max}} = 76.2^\circ$ , $\theta_{\text{min}} = 3.6^\circ$ |
| $\omega$ scans                                                                                                                                                                                                    | $h = -13 \rightarrow 13$                                               |
| Absorption correction: multi-scan <i>CrysAlis PRO</i> 1.171.41.112a (Rigaku Oxford Diffraction, 2021) Empirical absorption correction using spherical harmonics, implemented in SCALE3 ABSPACK scaling algorithm. | $k = -11 \rightarrow 15$                                               |
| $T_{\text{min}} = 0.635$ , $T_{\text{max}} = 1.000$                                                                                                                                                               | $l = -20 \rightarrow 20$                                               |
| 26881 measured reflections                                                                                                                                                                                        |                                                                        |

## Refinement

|                                 |                                                                              |
|---------------------------------|------------------------------------------------------------------------------|
| Refinement on $F^2$             | 0 restraints                                                                 |
| Least-squares matrix: full      | Hydrogen site location: inferred from neighbouring sites                     |
| $R[F^2 > 2\sigma(F^2)] = 0.125$ | H-atom parameters constrained                                                |
| $wR(F^2) = 0.398$               | $w = 1/[\sigma^2(F_o^2) + (0.2P)^2 + 5.P]$<br>where $P = (F_o^2 + 2F_c^2)/3$ |
| $S = 1.09$                      | $(\Delta/\sigma)_{\text{max}} < 0.001$                                       |
| 7857 reflections                | $\Delta_{\text{max}} = 0.57 \text{ e } \text{\AA}^{-3}$                      |
| 561 parameters                  | $\Delta_{\text{min}} = -0.43 \text{ e } \text{\AA}^{-3}$                     |

## Special details

*Geometry.* All esds (except the esd in the dihedral angle between two l.s. planes) are estimated using the full covariance matrix. The cell esds are taken into account individually in the estimation of esds in distances, angles and torsion angles; correlations between esds in cell parameters are only used when they are defined by crystal symmetry. An approximate (isotropic) treatment of cell esds is used for estimating esds involving l.s. planes.

Fractional atomic coordinates and isotropic or equivalent isotropic displacement parameters ( $\text{\AA}^2$ ) for (2021ncs0324z)

|     | x          | y          | z          | $U_{\text{iso}}^*/U_{\text{eq}}$ |
|-----|------------|------------|------------|----------------------------------|
| C1  | 0.2468 (5) | 1.0142 (4) | 0.5277 (4) | 0.0390 (13)                      |
| C2  | 0.2096 (5) | 1.0535 (4) | 0.4439 (4) | 0.0377 (12)                      |
| C3  | 0.1619 (5) | 1.1469 (4) | 0.4340 (4) | 0.0405 (13)                      |
| H3  | 0.157646   | 1.188312   | 0.482850   | 0.049*                           |
| C4  | 0.1215 (5) | 1.1786 (4) | 0.3542 (4) | 0.0437 (14)                      |
| H4  | 0.087782   | 1.240714   | 0.348458   | 0.052*                           |
| C5  | 0.1294 (6) | 1.1214 (5) | 0.2833 (4) | 0.0446 (14)                      |
| H5  | 0.101610   | 1.144063   | 0.228662   | 0.053*                           |
| C6  | 0.1777 (6) | 1.0309 (5) | 0.2911 (4) | 0.0432 (13)                      |
| H6  | 0.181950   | 0.991221   | 0.241406   | 0.052*                           |
| C7  | 0.2207 (5) | 0.9963 (4) | 0.3711 (4) | 0.0402 (13)                      |
| C8  | 0.2806 (5) | 0.9042 (4) | 0.3799 (4) | 0.0368 (12)                      |
| C9  | 0.2790 (5) | 0.8367 (4) | 0.3100 (4) | 0.0407 (13)                      |
| H9  | 0.225215   | 0.841590   | 0.255086   | 0.049*                           |
| C10 | 0.3566 (5) | 0.7600 (4) | 0.3189 (4) | 0.0392 (12)                      |
| C11 | 0.4423 (5) | 0.7568 (4) | 0.3978 (4) | 0.0370 (12)                      |
| C12 | 0.5445 (5) | 0.6965 (4) | 0.4101 (4) | 0.0367 (12)                      |
| C13 | 0.6138 (6) | 0.6815 (4) | 0.3511 (4) | 0.0385 (12)                      |
| C14 | 0.6935 (5) | 0.6086 (4) | 0.3620 (4) | 0.0382 (12)                      |
| H14 | 0.734870   | 0.595226   | 0.319110   | 0.046*                           |
| C15 | 0.7129 (5) | 0.5557 (4) | 0.4344 (4) | 0.0375 (12)                      |
| C16 | 0.7789 (5) | 0.4679 (4) | 0.4421 (4) | 0.0377 (12)                      |
| C17 | 0.7949 (5) | 0.4148 (4) | 0.3696 (4) | 0.0402 (13)                      |
| H17 | 0.766873   | 0.438965   | 0.315588   | 0.048*                           |
| C18 | 0.8515 (6) | 0.3269 (4) | 0.3755 (4) | 0.0424 (13)                      |
| H18 | 0.862853   | 0.292220   | 0.325937   | 0.051*                           |
| C19 | 0.8906 (6) | 0.2910 (4) | 0.4539 (4) | 0.0424 (13)                      |
| H19 | 0.928465   | 0.231034   | 0.458100   | 0.051*                           |
| C20 | 0.8755 (5) | 0.3411 (4) | 0.5261 (4) | 0.0400 (13)                      |
| H20 | 0.903138   | 0.315219   | 0.579370   | 0.048*                           |
| C21 | 0.8195 (5) | 0.4305 (4) | 0.5224 (4) | 0.0380 (12)                      |
| C22 | 0.8026 (5) | 0.4858 (4) | 0.5980 (4) | 0.0380 (12)                      |
| C23 | 0.7019 (5) | 0.5484 (4) | 0.5829 (4) | 0.0375 (12)                      |
| C24 | 0.6424 (5) | 0.5710 (4) | 0.6458 (4) | 0.0401 (13)                      |
| H24 | 0.653695   | 0.535366   | 0.695765   | 0.048*                           |
| C25 | 0.5657 (5) | 0.6464 (4) | 0.6354 (4) | 0.0394 (12)                      |

|      |             |             |             |             |
|------|-------------|-------------|-------------|-------------|
| H25  | 0.529476    | 0.664412    | 0.679897    | 0.047*      |
| C26  | 0.5424 (5)  | 0.6948 (4)  | 0.5610 (4)  | 0.0381 (12) |
| C27  | 0.4819 (5)  | 0.7862 (4)  | 0.5531 (4)  | 0.0386 (12) |
| C28  | 0.4803 (5)  | 0.8497 (4)  | 0.6245 (4)  | 0.0393 (12) |
| H28  | 0.526406    | 0.838424    | 0.679782    | 0.047*      |
| C29  | 0.4113 (6)  | 0.9303 (4)  | 0.6158 (4)  | 0.0421 (13) |
| H29  | 0.415242    | 0.975733    | 0.664948    | 0.050*      |
| C30  | 0.3383 (5)  | 0.9442 (4)  | 0.5371 (4)  | 0.0374 (12) |
| C31  | 0.3476 (5)  | 0.8878 (4)  | 0.4627 (4)  | 0.0386 (12) |
| C32  | 0.4256 (5)  | 0.8107 (4)  | 0.4709 (4)  | 0.0367 (12) |
| C33  | 0.5813 (5)  | 0.6579 (4)  | 0.4903 (4)  | 0.0363 (12) |
| C34  | 0.6654 (5)  | 0.5851 (4)  | 0.5029 (4)  | 0.0381 (12) |
| C35  | 0.1907 (5)  | 1.0312 (4)  | 0.5923 (4)  | 0.0385 (12) |
| C36  | 0.1059 (5)  | 1.1023 (4)  | 0.5940 (4)  | 0.0406 (13) |
| C37  | 0.2013 (5)  | 0.9744 (4)  | 0.6655 (4)  | 0.0399 (12) |
| C38  | 0.8810 (6)  | 0.4904 (4)  | 0.6799 (4)  | 0.0411 (13) |
| C39  | 0.8887 (6)  | 0.5661 (5)  | 0.7498 (4)  | 0.0426 (13) |
| C40  | 0.9777 (6)  | 0.4295 (4)  | 0.7065 (4)  | 0.0416 (13) |
| C41  | 0.2652 (6)  | 0.6901 (4)  | 0.1709 (4)  | 0.0434 (13) |
| H41A | 0.294230    | 0.762126    | 0.152533    | 0.052*      |
| H41B | 0.171861    | 0.678868    | 0.172257    | 0.052*      |
| C42  | 0.2759 (6)  | 0.6025 (5)  | 0.1083 (4)  | 0.0455 (14) |
| H42A | 0.366809    | 0.619064    | 0.101678    | 0.055*      |
| H42B | 0.258215    | 0.531807    | 0.130783    | 0.055*      |
| C43  | 0.1777 (7)  | 0.5960 (5)  | 0.0227 (5)  | 0.0533 (16) |
| H43A | 0.193735    | 0.668202    | 0.002501    | 0.064*      |
| H43B | 0.087281    | 0.578071    | 0.030249    | 0.064*      |
| C44  | 0.1835 (8)  | 0.5125 (6)  | -0.0462 (5) | 0.0593 (17) |
| H44A | 0.167264    | 0.440407    | -0.025739   | 0.071*      |
| H44B | 0.110515    | 0.509449    | -0.097935   | 0.071*      |
| C45  | 0.3106 (8)  | 0.5333 (6)  | -0.0707 (5) | 0.0609 (18) |
| H45A | 0.302453    | 0.476175    | -0.116578   | 0.073*      |
| H45B | 0.382243    | 0.527562    | -0.020797   | 0.073*      |
| C46  | 0.3500 (9)  | 0.6423 (7)  | -0.1010 (6) | 0.072 (2)   |
| H46A | 0.369938    | 0.699485    | -0.052718   | 0.087*      |
| H46B | 0.273957    | 0.652093    | -0.145875   | 0.087*      |
| C47  | 0.4700 (10) | 0.6574 (9)  | -0.1367 (6) | 0.088 (3)   |
| H47A | 0.544660    | 0.641828    | -0.094031   | 0.106*      |
| H47B | 0.447909    | 0.605608    | -0.188756   | 0.106*      |
| C48  | 0.5114 (14) | 0.7724 (12) | -0.1580 (8) | 0.121 (5)   |

|      |            |            |             |             |
|------|------------|------------|-------------|-------------|
| H48A | 0.443241   | 0.783914   | -0.206637   | 0.182*      |
| H48B | 0.595667   | 0.783461   | -0.172767   | 0.182*      |
| H48C | 0.522002   | 0.823870   | -0.108522   | 0.182*      |
| C49  | 0.6645 (6) | 0.7228 (4) | 0.2195 (4)  | 0.0439 (13) |
| H49A | 0.626491   | 0.647106   | 0.192076    | 0.053*      |
| H49B | 0.761285   | 0.734669   | 0.243287    | 0.053*      |
| C50  | 0.6358 (6) | 0.8009 (4) | 0.1547 (4)  | 0.0456 (14) |
| H50A | 0.672835   | 0.876082   | 0.183329    | 0.055*      |
| H50B | 0.538770   | 0.788751   | 0.132188    | 0.055*      |
| C51  | 0.6949 (6) | 0.7870 (5) | 0.0806 (4)  | 0.0472 (14) |
| H51A | 0.658263   | 0.828525   | 0.035253    | 0.057*      |
| H51B | 0.665426   | 0.709645   | 0.056776    | 0.057*      |
| C52  | 0.8463 (7) | 0.8230 (5) | 0.1025 (5)  | 0.0517 (15) |
| H52A | 0.877861   | 0.895963   | 0.135431    | 0.062*      |
| H52B | 0.883655   | 0.772590   | 0.139122    | 0.062*      |
| C53  | 0.8971 (7) | 0.8261 (5) | 0.0235 (5)  | 0.0516 (15) |
| H53A | 0.856957   | 0.874588   | -0.013916   | 0.062*      |
| H53B | 0.867360   | 0.752609   | -0.008390   | 0.062*      |
| C54  | 1.0479 (7) | 0.8652 (5) | 0.0434 (5)  | 0.0577 (17) |
| H54A | 1.077846   | 0.937180   | 0.077761    | 0.069*      |
| H54B | 1.087707   | 0.814714   | 0.078615    | 0.069*      |
| C55  | 1.0996 (7) | 0.8737 (5) | -0.0352 (5) | 0.0547 (17) |
| H55A | 1.057947   | 0.922471   | -0.071417   | 0.066*      |
| H55B | 1.072343   | 0.801246   | -0.068728   | 0.066*      |
| C56  | 1.2496 (8) | 0.9159 (6) | -0.0145 (6) | 0.065 (2)   |
| H56A | 1.277741   | 0.987355   | 0.019141    | 0.097*      |
| H56B | 1.275767   | 0.921756   | -0.067698   | 0.097*      |
| H56C | 1.291801   | 0.865736   | 0.018374    | 0.097*      |
| N1   | 0.0383 (5) | 1.1569 (4) | 0.6018 (4)  | 0.0482 (13) |
| N2   | 0.2019 (5) | 0.9309 (4) | 0.7265 (4)  | 0.0484 (12) |
| N3   | 0.9061 (6) | 0.6259 (5) | 0.8094 (4)  | 0.0563 (14) |
| N4   | 1.0562 (5) | 0.3858 (4) | 0.7357 (4)  | 0.0486 (12) |
| O1   | 0.3462 (4) | 0.6859 (3) | 0.2538 (3)  | 0.0441 (10) |
| O2   | 0.6047 (4) | 0.7433 (3) | 0.2862 (3)  | 0.0421 (9)  |

*Atomic displacement parameters ( $\text{\AA}^2$ ) for (2021ncs0324z)*

|    | $U^{11}$  | $U^{22}$  | $U^{33}$  | $U^{12}$    | $U^{13}$  | $U^{23}$  |
|----|-----------|-----------|-----------|-------------|-----------|-----------|
| C1 | 0.036 (3) | 0.024 (2) | 0.057 (4) | 0.0056 (19) | 0.016 (3) | 0.004 (2) |
| C2 | 0.033 (2) | 0.024 (2) | 0.058 (4) | 0.0055 (18) | 0.017 (2) | 0.005 (2) |



|     |           |           |           |             |           |           |
|-----|-----------|-----------|-----------|-------------|-----------|-----------|
| C3  | 0.036 (3) | 0.027 (2) | 0.061 (4) | 0.009 (2)   | 0.018 (3) | 0.007 (2) |
| C4  | 0.038 (3) | 0.029 (2) | 0.068 (4) | 0.009 (2)   | 0.018 (3) | 0.013 (3) |
| C5  | 0.048 (3) | 0.039 (3) | 0.053 (4) | 0.018 (2)   | 0.017 (3) | 0.014 (3) |
| C6  | 0.045 (3) | 0.036 (3) | 0.053 (4) | 0.016 (2)   | 0.016 (3) | 0.009 (2) |
| C7  | 0.040 (3) | 0.028 (2) | 0.055 (4) | 0.010 (2)   | 0.016 (3) | 0.007 (2) |
| C8  | 0.035 (2) | 0.024 (2) | 0.054 (4) | 0.0056 (18) | 0.018 (2) | 0.006 (2) |
| C9  | 0.036 (3) | 0.034 (3) | 0.054 (4) | 0.014 (2)   | 0.012 (3) | 0.007 (2) |
| C10 | 0.039 (3) | 0.028 (2) | 0.053 (4) | 0.009 (2)   | 0.018 (3) | 0.004 (2) |
| C11 | 0.036 (3) | 0.025 (2) | 0.054 (4) | 0.0110 (19) | 0.017 (2) | 0.008 (2) |
| C12 | 0.037 (3) | 0.025 (2) | 0.051 (3) | 0.0096 (19) | 0.016 (2) | 0.005 (2) |
| C13 | 0.045 (3) | 0.027 (2) | 0.045 (3) | 0.009 (2)   | 0.015 (3) | 0.007 (2) |
| C14 | 0.040 (3) | 0.030 (2) | 0.049 (3) | 0.012 (2)   | 0.016 (3) | 0.005 (2) |
| C15 | 0.035 (2) | 0.023 (2) | 0.058 (4) | 0.0106 (19) | 0.015 (3) | 0.009 (2) |
| C16 | 0.038 (3) | 0.024 (2) | 0.054 (4) | 0.0090 (19) | 0.018 (3) | 0.007 (2) |
| C17 | 0.042 (3) | 0.029 (2) | 0.053 (4) | 0.013 (2)   | 0.014 (3) | 0.006 (2) |
| C18 | 0.045 (3) | 0.030 (2) | 0.058 (4) | 0.014 (2)   | 0.020 (3) | 0.007 (2) |
| C19 | 0.039 (3) | 0.034 (3) | 0.059 (4) | 0.014 (2)   | 0.018 (3) | 0.010 (3) |
| C20 | 0.041 (3) | 0.025 (2) | 0.057 (4) | 0.011 (2)   | 0.016 (3) | 0.009 (2) |
| C21 | 0.034 (2) | 0.029 (2) | 0.052 (4) | 0.0074 (19) | 0.014 (2) | 0.007 (2) |
| C22 | 0.038 (3) | 0.025 (2) | 0.056 (4) | 0.0103 (19) | 0.019 (3) | 0.012 (2) |
| C23 | 0.038 (3) | 0.023 (2) | 0.052 (3) | 0.0063 (19) | 0.016 (2) | 0.006 (2) |
| C24 | 0.041 (3) | 0.028 (2) | 0.054 (4) | 0.010 (2)   | 0.015 (3) | 0.009 (2) |
| C25 | 0.039 (3) | 0.033 (3) | 0.050 (4) | 0.010 (2)   | 0.018 (3) | 0.006 (2) |
| C26 | 0.032 (2) | 0.029 (2) | 0.054 (4) | 0.0088 (19) | 0.013 (2) | 0.004 (2) |
| C27 | 0.037 (3) | 0.030 (2) | 0.053 (4) | 0.010 (2)   | 0.018 (3) | 0.009 (2) |
| C28 | 0.041 (3) | 0.029 (2) | 0.051 (4) | 0.012 (2)   | 0.016 (3) | 0.008 (2) |
| C29 | 0.045 (3) | 0.032 (3) | 0.053 (4) | 0.008 (2)   | 0.022 (3) | 0.004 (2) |
| C30 | 0.036 (3) | 0.024 (2) | 0.057 (4) | 0.0098 (19) | 0.019 (3) | 0.007 (2) |
| C31 | 0.039 (3) | 0.024 (2) | 0.056 (4) | 0.0061 (19) | 0.020 (3) | 0.007 (2) |
| C32 | 0.034 (2) | 0.026 (2) | 0.050 (3) | 0.0066 (19) | 0.013 (2) | 0.006 (2) |
| C33 | 0.032 (2) | 0.027 (2) | 0.050 (3) | 0.0066 (19) | 0.014 (2) | 0.003 (2) |
| C34 | 0.034 (2) | 0.027 (2) | 0.052 (4) | 0.0076 (19) | 0.012 (2) | 0.005 (2) |
| C35 | 0.040 (3) | 0.024 (2) | 0.057 (4) | 0.012 (2)   | 0.019 (3) | 0.005 (2) |
| C36 | 0.040 (3) | 0.028 (2) | 0.055 (4) | 0.009 (2)   | 0.016 (3) | 0.007 (2) |
| C37 | 0.038 (3) | 0.039 (3) | 0.044 (3) | 0.011 (2)   | 0.014 (2) | 0.003 (2) |
| C38 | 0.041 (3) | 0.031 (3) | 0.056 (4) | 0.010 (2)   | 0.020 (3) | 0.011 (2) |
| C39 | 0.045 (3) | 0.037 (3) | 0.047 (4) | 0.014 (2)   | 0.010 (3) | 0.009 (3) |
| C40 | 0.044 (3) | 0.034 (3) | 0.052 (4) | 0.015 (2)   | 0.016 (3) | 0.006 (2) |
| C41 | 0.046 (3) | 0.036 (3) | 0.050 (4) | 0.011 (2)   | 0.016 (3) | 0.008 (2) |
| C42 | 0.049 (3) | 0.037 (3) | 0.055 (4) | 0.015 (2)   | 0.018 (3) | 0.011 (3) |

|     |           |             |           |             |             |             |
|-----|-----------|-------------|-----------|-------------|-------------|-------------|
| C43 | 0.055 (4) | 0.045 (3)   | 0.062 (4) | 0.014 (3)   | 0.019 (3)   | 0.007 (3)   |
| C44 | 0.068 (4) | 0.048 (3)   | 0.060 (4) | 0.018 (3)   | 0.014 (4)   | 0.004 (3)   |
| C45 | 0.062 (4) | 0.062 (4)   | 0.058 (5) | 0.021 (3)   | 0.014 (4)   | -0.007 (3)  |
| C46 | 0.073 (5) | 0.082 (5)   | 0.067 (5) | 0.025 (4)   | 0.023 (4)   | 0.016 (4)   |
| C47 | 0.071 (5) | 0.116 (7)   | 0.060 (5) | -0.006 (5)  | 0.018 (4)   | -0.004 (5)  |
| C48 | 0.114 (9) | 0.150 (11)  | 0.068 (7) | -0.022 (8)  | 0.018 (6)   | 0.030 (7)   |
| C49 | 0.051 (3) | 0.029 (2)   | 0.057 (4) | 0.014 (2)   | 0.020 (3)   | 0.005 (2)   |
| C50 | 0.051 (3) | 0.031 (3)   | 0.057 (4) | 0.011 (2)   | 0.017 (3)   | 0.010 (2)   |
| C51 | 0.055 (3) | 0.038 (3)   | 0.053 (4) | 0.015 (2)   | 0.019 (3)   | 0.009 (3)   |
| C52 | 0.058 (4) | 0.043 (3)   | 0.064 (4) | 0.022 (3)   | 0.024 (3)   | 0.016 (3)   |
| C53 | 0.063 (4) | 0.037 (3)   | 0.061 (4) | 0.014 (3)   | 0.025 (3)   | 0.012 (3)   |
| C54 | 0.060 (4) | 0.047 (3)   | 0.074 (5) | 0.021 (3)   | 0.026 (4)   | 0.017 (3)   |
| C55 | 0.062 (4) | 0.039 (3)   | 0.074 (5) | 0.021 (3)   | 0.029 (4)   | 0.014 (3)   |
| C56 | 0.070 (4) | 0.047 (3)   | 0.091 (6) | 0.020 (3)   | 0.041 (4)   | 0.015 (4)   |
| N1  | 0.049 (3) | 0.032 (2)   | 0.070 (4) | 0.012 (2)   | 0.027 (3)   | 0.007 (2)   |
| N2  | 0.050 (3) | 0.043 (3)   | 0.058 (4) | 0.017 (2)   | 0.021 (3)   | 0.006 (2)   |
| N3  | 0.058 (3) | 0.052 (3)   | 0.062 (4) | 0.024 (3)   | 0.013 (3)   | 0.008 (3)   |
| N4  | 0.052 (3) | 0.041 (3)   | 0.059 (3) | 0.021 (2)   | 0.017 (3)   | 0.007 (2)   |
| O1  | 0.049 (2) | 0.0372 (19) | 0.049 (3) | 0.0170 (16) | 0.0128 (19) | 0.0032 (17) |
| O2  | 0.049 (2) | 0.0348 (19) | 0.051 (2) | 0.0173 (16) | 0.0204 (19) | 0.0122 (17) |

*Geometric parameters (Å, °) for (2021ncs0324z)*

|        |            |          |            |
|--------|------------|----------|------------|
| C1—C2  | 1.475 (9)  | C33—C34  | 1.438 (7)  |
| C1—C30 | 1.471 (7)  | C35—C36  | 1.440 (7)  |
| C1—C35 | 1.375 (9)  | C35—C37  | 1.425 (9)  |
| C2—C3  | 1.411 (7)  | C36—N1   | 1.148 (7)  |
| C2—C7  | 1.408 (9)  | C37—N2   | 1.166 (8)  |
| C3—H3  | 0.9500     | C38—C39  | 1.429 (9)  |
| C3—C4  | 1.380 (9)  | C38—C40  | 1.442 (8)  |
| C4—H4  | 0.9500     | C39—N3   | 1.151 (9)  |
| C4—C5  | 1.368 (10) | C40—N4   | 1.145 (8)  |
| C5—H5  | 0.9500     | C41—H41A | 0.9900     |
| C5—C6  | 1.380 (8)  | C41—H41B | 0.9900     |
| C6—H6  | 0.9500     | C41—C42  | 1.521 (9)  |
| C6—C7  | 1.402 (9)  | C41—O1   | 1.424 (8)  |
| C7—C8  | 1.471 (7)  | C42—H42A | 0.9900     |
| C8—C9  | 1.388 (9)  | C42—H42B | 0.9900     |
| C8—C31 | 1.415 (9)  | C42—C43  | 1.508 (10) |
| C9—H9  | 0.9500     | C43—H43A | 0.9900     |

|         |           |          |            |
|---------|-----------|----------|------------|
| C9—C10  | 1.426 (7) | C43—H43B | 0.9900     |
| C10—C11 | 1.391 (9) | C43—C44  | 1.533 (10) |
| C10—O1  | 1.350 (7) | C44—H44A | 0.9900     |
| C11—C12 | 1.473 (7) | C44—H44B | 0.9900     |
| C11—C32 | 1.417 (9) | C44—C45  | 1.495 (11) |
| C12—C13 | 1.392 (8) | C45—H45A | 0.9900     |
| C12—C33 | 1.418 (9) | C45—H45B | 0.9900     |
| C13—C14 | 1.401 (7) | C45—C46  | 1.509 (12) |
| C13—O2  | 1.355 (7) | C46—H46A | 0.9900     |
| C14—H14 | 0.9500    | C46—H46B | 0.9900     |
| C14—C15 | 1.388 (8) | C46—C47  | 1.527 (13) |
| C15—C16 | 1.463 (7) | C47—H47A | 0.9900     |
| C15—C34 | 1.411 (9) | C47—H47B | 0.9900     |
| C16—C17 | 1.401 (9) | C47—C48  | 1.521 (17) |
| C16—C21 | 1.419 (9) | C48—H48A | 0.9800     |
| C17—H17 | 0.9500    | C48—H48B | 0.9800     |
| C17—C18 | 1.400 (7) | C48—H48C | 0.9800     |
| C18—H18 | 0.9500    | C49—H49A | 0.9900     |
| C18—C19 | 1.382 (9) | C49—H49B | 0.9900     |
| C19—H19 | 0.9500    | C49—C50  | 1.519 (8)  |
| C19—C20 | 1.375 (9) | C49—O2   | 1.441 (8)  |
| C20—H20 | 0.9500    | C50—H50A | 0.9900     |
| C20—C21 | 1.413 (7) | C50—H50B | 0.9900     |
| C21—C22 | 1.462 (9) | C50—C51  | 1.524 (9)  |
| C22—C23 | 1.479 (7) | C51—H51A | 0.9900     |
| C22—C38 | 1.378 (9) | C51—H51B | 0.9900     |
| C23—C24 | 1.394 (9) | C51—C52  | 1.531 (9)  |
| C23—C34 | 1.405 (9) | C52—H52A | 0.9900     |
| C24—H24 | 0.9500    | C52—H52B | 0.9900     |
| C24—C25 | 1.405 (8) | C52—C53  | 1.522 (10) |
| C25—H25 | 0.9500    | C53—H53A | 0.9900     |
| C25—C26 | 1.386 (8) | C53—H53B | 0.9900     |
| C26—C27 | 1.466 (7) | C53—C54  | 1.530 (10) |
| C26—C33 | 1.418 (9) | C54—H54A | 0.9900     |
| C27—C28 | 1.390 (9) | C54—H54B | 0.9900     |
| C27—C32 | 1.412 (9) | C54—C55  | 1.523 (11) |
| C28—H28 | 0.9500    | C55—H55A | 0.9900     |
| C28—C29 | 1.404 (8) | C55—H55B | 0.9900     |
| C29—H29 | 0.9500    | C55—C56  | 1.523 (10) |
| C29—C30 | 1.371 (9) | C56—H56A | 0.9800     |

|             |           |               |           |
|-------------|-----------|---------------|-----------|
| C30—C31     | 1.416 (9) | C56—H56B      | 0.9800    |
| C31—C32     | 1.434 (7) | C56—H56C      | 0.9800    |
|             |           |               |           |
| C30—C1—C2   | 116.7 (5) | N1—C36—C35    | 174.6 (7) |
| C35—C1—C2   | 123.2 (5) | N2—C37—C35    | 174.7 (6) |
| C35—C1—C30  | 119.8 (5) | C22—C38—C39   | 124.2 (5) |
| C3—C2—C1    | 122.0 (5) | C22—C38—C40   | 126.0 (5) |
| C3—C2—C7    | 118.6 (6) | C39—C38—C40   | 109.5 (5) |
| C7—C2—C1    | 119.5 (5) | N3—C39—C38    | 173.8 (6) |
| C2—C3—H3    | 119.7     | N4—C40—C38    | 173.1 (7) |
| C4—C3—C2    | 120.7 (6) | H41A—C41—H41B | 108.3     |
| C4—C3—H3    | 119.7     | C42—C41—H41A  | 109.8     |
| C3—C4—H4    | 119.7     | C42—C41—H41B  | 109.8     |
| C5—C4—C3    | 120.6 (5) | O1—C41—H41A   | 109.8     |
| C5—C4—H4    | 119.7     | O1—C41—H41B   | 109.8     |
| C4—C5—H5    | 120.0     | O1—C41—C42    | 109.3 (5) |
| C4—C5—C6    | 120.0 (6) | C41—C42—H42A  | 109.6     |
| C6—C5—H5    | 120.0     | C41—C42—H42B  | 109.6     |
| C5—C6—H6    | 119.4     | H42A—C42—H42B | 108.1     |
| C5—C6—C7    | 121.1 (6) | C43—C42—C41   | 110.2 (5) |
| C7—C6—H6    | 119.4     | C43—C42—H42A  | 109.6     |
| C2—C7—C8    | 120.1 (6) | C43—C42—H42B  | 109.6     |
| C6—C7—C2    | 118.9 (5) | C42—C43—H43A  | 108.6     |
| C6—C7—C8    | 121.0 (6) | C42—C43—H43B  | 108.6     |
| C9—C8—C7    | 122.5 (6) | C42—C43—C44   | 114.5 (6) |
| C9—C8—C31   | 119.2 (5) | H43A—C43—H43B | 107.6     |
| C31—C8—C7   | 118.2 (5) | C44—C43—H43A  | 108.6     |
| C8—C9—H9    | 119.4     | C44—C43—H43B  | 108.6     |
| C8—C9—C10   | 121.2 (6) | C43—C44—H44A  | 108.4     |
| C10—C9—H9   | 119.4     | C43—C44—H44B  | 108.4     |
| C11—C10—C9  | 119.9 (5) | H44A—C44—H44B | 107.5     |
| O1—C10—C9   | 122.2 (6) | C45—C44—C43   | 115.5 (6) |
| O1—C10—C11  | 117.8 (5) | C45—C44—H44A  | 108.4     |
| C10—C11—C12 | 123.8 (5) | C45—C44—H44B  | 108.4     |
| C10—C11—C32 | 117.8 (5) | C44—C45—H45A  | 108.7     |
| C32—C11—C12 | 118.3 (5) | C44—C45—H45B  | 108.7     |
| C13—C12—C11 | 124.6 (5) | C44—C45—C46   | 114.3 (6) |
| C13—C12—C33 | 118.0 (5) | H45A—C45—H45B | 107.6     |
| C33—C12—C11 | 117.3 (5) | C46—C45—H45A  | 108.7     |
| C12—C13—C14 | 120.4 (5) | C46—C45—H45B  | 108.7     |

|             |           |               |            |
|-------------|-----------|---------------|------------|
| O2—C13—C12  | 117.0 (5) | C45—C46—H46A  | 108.8      |
| O2—C13—C14  | 122.5 (5) | C45—C46—H46B  | 108.8      |
| C13—C14—H14 | 119.4     | C45—C46—C47   | 113.9 (8)  |
| C15—C14—C13 | 121.2 (5) | H46A—C46—H46B | 107.7      |
| C15—C14—H14 | 119.4     | C47—C46—H46A  | 108.8      |
| C14—C15—C16 | 122.4 (5) | C47—C46—H46B  | 108.8      |
| C14—C15—C34 | 119.6 (5) | C46—C47—H47A  | 109.5      |
| C34—C15—C16 | 118.0 (5) | C46—C47—H47B  | 109.5      |
| C17—C16—C15 | 120.5 (5) | H47A—C47—H47B | 108.1      |
| C17—C16—C21 | 119.1 (5) | C48—C47—C46   | 110.8 (10) |
| C21—C16—C15 | 120.2 (5) | C48—C47—H47A  | 109.5      |
| C16—C17—H17 | 119.4     | C48—C47—H47B  | 109.5      |
| C18—C17—C16 | 121.1 (6) | C47—C48—H48A  | 109.5      |
| C18—C17—H17 | 119.4     | C47—C48—H48B  | 109.5      |
| C17—C18—H18 | 120.3     | C47—C48—H48C  | 109.5      |
| C19—C18—C17 | 119.4 (6) | H48A—C48—H48B | 109.5      |
| C19—C18—H18 | 120.3     | H48A—C48—H48C | 109.5      |
| C18—C19—H19 | 119.6     | H48B—C48—H48C | 109.5      |
| C20—C19—C18 | 120.7 (5) | H49A—C49—H49B | 108.5      |
| C20—C19—H19 | 119.6     | C50—C49—H49A  | 110.3      |
| C19—C20—H20 | 119.4     | C50—C49—H49B  | 110.3      |
| C19—C20—C21 | 121.3 (6) | O2—C49—H49A   | 110.3      |
| C21—C20—H20 | 119.4     | O2—C49—H49B   | 110.3      |
| C16—C21—C22 | 119.1 (5) | O2—C49—C50    | 107.2 (4)  |
| C20—C21—C16 | 118.4 (5) | C49—C50—H50A  | 109.2      |
| C20—C21—C22 | 122.6 (5) | C49—C50—H50B  | 109.2      |
| C21—C22—C23 | 116.5 (5) | C49—C50—C51   | 112.1 (5)  |
| C38—C22—C21 | 124.3 (5) | H50A—C50—H50B | 107.9      |
| C38—C22—C23 | 119.0 (5) | C51—C50—H50A  | 109.2      |
| C24—C23—C22 | 121.5 (5) | C51—C50—H50B  | 109.2      |
| C24—C23—C34 | 119.7 (5) | C50—C51—H51A  | 108.4      |
| C34—C23—C22 | 118.8 (5) | C50—C51—H51B  | 108.4      |
| C23—C24—H24 | 120.0     | C50—C51—C52   | 115.6 (6)  |
| C23—C24—C25 | 120.0 (5) | H51A—C51—H51B | 107.4      |
| C25—C24—H24 | 120.0     | C52—C51—H51A  | 108.4      |
| C24—C25—H25 | 119.6     | C52—C51—H51B  | 108.4      |
| C26—C25—C24 | 120.8 (5) | C51—C52—H52A  | 109.1      |
| C26—C25—H25 | 119.6     | C51—C52—H52B  | 109.1      |
| C25—C26—C27 | 122.2 (5) | H52A—C52—H52B | 107.8      |
| C25—C26—C33 | 119.7 (5) | C53—C52—C51   | 112.7 (6)  |

|                |            |                 |            |
|----------------|------------|-----------------|------------|
| C33—C26—C27    | 118.0 (5)  | C53—C52—H52A    | 109.1      |
| C28—C27—C26    | 121.7 (6)  | C53—C52—H52B    | 109.1      |
| C28—C27—C32    | 119.4 (5)  | C52—C53—H53A    | 108.8      |
| C32—C27—C26    | 118.9 (5)  | C52—C53—H53B    | 108.8      |
| C27—C28—H28    | 119.6      | C52—C53—C54     | 113.8 (7)  |
| C27—C28—C29    | 120.8 (6)  | H53A—C53—H53B   | 107.7      |
| C29—C28—H28    | 119.6      | C54—C53—H53A    | 108.8      |
| C28—C29—H29    | 119.7      | C54—C53—H53B    | 108.8      |
| C30—C29—C28    | 120.6 (6)  | C53—C54—H54A    | 108.7      |
| C30—C29—H29    | 119.7      | C53—C54—H54B    | 108.7      |
| C29—C30—C1     | 121.6 (5)  | H54A—C54—H54B   | 107.6      |
| C29—C30—C31    | 119.7 (5)  | C55—C54—C53     | 114.3 (7)  |
| C31—C30—C1     | 118.7 (6)  | C55—C54—H54A    | 108.7      |
| C8—C31—C32     | 118.5 (5)  | C55—C54—H54B    | 108.7      |
| C30—C31—C8     | 122.0 (5)  | C54—C55—H55A    | 108.8      |
| C30—C31—C32    | 119.6 (6)  | C54—C55—H55B    | 108.8      |
| C11—C32—C31    | 121.0 (5)  | C54—C55—C56     | 113.7 (7)  |
| C27—C32—C11    | 120.2 (5)  | H55A—C55—H55B   | 107.7      |
| C27—C32—C31    | 118.7 (5)  | C56—C55—H55A    | 108.8      |
| C12—C33—C34    | 120.4 (5)  | C56—C55—H55B    | 108.8      |
| C26—C33—C12    | 121.0 (5)  | C55—C56—H56A    | 109.5      |
| C26—C33—C34    | 118.5 (5)  | C55—C56—H56B    | 109.5      |
| C15—C34—C33    | 118.4 (5)  | C55—C56—H56C    | 109.5      |
| C23—C34—C15    | 121.9 (5)  | H56A—C56—H56B   | 109.5      |
| C23—C34—C33    | 119.7 (5)  | H56A—C56—H56C   | 109.5      |
| C1—C35—C36     | 125.9 (5)  | H56B—C56—H56C   | 109.5      |
| C1—C35—C37     | 124.1 (5)  | C10—O1—C41      | 119.5 (4)  |
| C37—C35—C36    | 109.9 (5)  | C13—O2—C49      | 118.6 (4)  |
|                |            |                 |            |
| C1—C2—C3—C4    | -176.7 (5) | C21—C16—C17—C18 | -0.8 (8)   |
| C1—C2—C7—C6    | 176.3 (5)  | C21—C22—C23—C24 | 156.4 (5)  |
| C1—C2—C7—C8    | -5.7 (7)   | C21—C22—C23—C34 | -23.3 (7)  |
| C1—C30—C31—C8  | 5.6 (7)    | C21—C22—C38—C39 | 162.7 (5)  |
| C1—C30—C31—C32 | -173.6 (4) | C21—C22—C38—C40 | -9.8 (8)   |
| C2—C1—C30—C29  | 159.4 (5)  | C22—C23—C24—C25 | 168.5 (5)  |
| C2—C1—C30—C31  | -22.3 (7)  | C22—C23—C34—C15 | 5.9 (8)    |
| C2—C1—C35—C36  | -10.5 (9)  | C22—C23—C34—C33 | -171.8 (5) |
| C2—C1—C35—C37  | 164.9 (5)  | C23—C22—C38—C39 | -11.5 (8)  |
| C2—C3—C4—C5    | -1.4 (8)   | C23—C22—C38—C40 | 175.9 (5)  |
| C2—C7—C8—C9    | 171.6 (5)  | C23—C24—C25—C26 | 3.4 (8)    |

|                 |            |                 |            |
|-----------------|------------|-----------------|------------|
| C2—C7—C8—C31    | -11.4 (7)  | C24—C23—C34—C15 | -173.8 (5) |
| C3—C2—C7—C6     | -3.2 (8)   | C24—C23—C34—C33 | 8.6 (8)    |
| C3—C2—C7—C8     | 174.7 (5)  | C24—C25—C26—C27 | -169.8 (5) |
| C3—C4—C5—C6     | 0.2 (9)    | C24—C25—C26—C33 | 8.3 (8)    |
| C4—C5—C6—C7     | -0.7 (9)   | C25—C26—C27—C28 | 19.4 (8)   |
| C5—C6—C7—C2     | 2.2 (8)    | C25—C26—C27—C32 | -161.4 (5) |
| C5—C6—C7—C8     | -175.7 (5) | C25—C26—C33—C12 | 172.2 (5)  |
| C6—C7—C8—C9     | -10.5 (8)  | C25—C26—C33—C34 | -11.3 (8)  |
| C6—C7—C8—C31    | 166.5 (5)  | C26—C27—C28—C29 | -174.1 (5) |
| C7—C2—C3—C4     | 2.9 (8)    | C26—C27—C32—C11 | -7.9 (7)   |
| C7—C8—C9—C10    | 169.2 (5)  | C26—C27—C32—C31 | 169.8 (5)  |
| C7—C8—C31—C30   | 11.5 (7)   | C26—C33—C34—C15 | -174.7 (5) |
| C7—C8—C31—C32   | -169.3 (5) | C26—C33—C34—C23 | 3.0 (7)    |
| C8—C9—C10—C11   | -4.2 (8)   | C27—C26—C33—C12 | -9.6 (8)   |
| C8—C9—C10—O1    | 172.9 (5)  | C27—C26—C33—C34 | 166.9 (5)  |
| C8—C31—C32—C11  | 3.9 (7)    | C27—C28—C29—C30 | 3.5 (8)    |
| C8—C31—C32—C27  | -173.8 (5) | C28—C27—C32—C11 | 171.2 (5)  |
| C9—C8—C31—C30   | -171.4 (5) | C28—C27—C32—C31 | -11.1 (7)  |
| C9—C8—C31—C32   | 7.8 (7)    | C28—C29—C30—C1  | 169.1 (5)  |
| C9—C10—C11—C12  | -167.6 (5) | C28—C29—C30—C31 | -9.2 (8)   |
| C9—C10—C11—C32  | 15.6 (7)   | C29—C30—C31—C8  | -176.1 (5) |
| C9—C10—O1—C41   | 6.2 (8)    | C29—C30—C31—C32 | 4.7 (7)    |
| C10—C11—C12—C13 | 33.3 (8)   | C30—C1—C2—C3    | -158.1 (5) |
| C10—C11—C12—C33 | -151.5 (5) | C30—C1—C2—C7    | 22.3 (7)   |
| C10—C11—C32—C27 | 162.1 (5)  | C30—C1—C35—C36  | 176.2 (5)  |
| C10—C11—C32—C31 | -15.5 (7)  | C30—C1—C35—C37  | -8.3 (8)   |
| C11—C10—O1—C41  | -176.6 (5) | C30—C31—C32—C11 | -176.9 (4) |
| C11—C12—C13—C14 | -169.6 (5) | C30—C31—C32—C27 | 5.4 (7)    |
| C11—C12—C13—O2  | 13.1 (8)   | C31—C8—C9—C10   | -7.8 (8)   |
| C11—C12—C33—C26 | -12.8 (7)  | C32—C11—C12—C13 | -149.9 (5) |
| C11—C12—C33—C34 | 170.8 (5)  | C32—C11—C12—C33 | 25.3 (7)   |
| C12—C11—C32—C27 | -14.9 (7)  | C32—C27—C28—C29 | 6.8 (8)    |
| C12—C11—C32—C31 | 167.5 (4)  | C33—C12—C13—C14 | 15.2 (8)   |
| C12—C13—C14—C15 | -4.7 (8)   | C33—C12—C13—O2  | -162.0 (5) |
| C12—C13—O2—C49  | -174.1 (5) | C33—C26—C27—C28 | -158.7 (5) |
| C12—C33—C34—C15 | 1.7 (7)    | C33—C26—C27—C32 | 20.4 (7)   |
| C12—C33—C34—C23 | 179.4 (5)  | C34—C15—C16—C17 | 162.1 (5)  |
| C13—C12—C33—C26 | 162.7 (5)  | C34—C15—C16—C21 | -13.6 (8)  |
| C13—C12—C33—C34 | -13.7 (7)  | C34—C23—C24—C25 | -11.9 (8)  |
| C13—C14—C15—C16 | 170.8 (5)  | C35—C1—C2—C3    | 28.5 (8)   |

|                 |            |                 |            |
|-----------------|------------|-----------------|------------|
| C13—C14—C15—C34 | -7.8 (8)   | C35—C1—C2—C7    | -151.1 (5) |
| C14—C13—O2—C49  | 8.7 (8)    | C35—C1—C30—C29  | -26.9 (8)  |
| C14—C15—C16—C17 | -16.5 (8)  | C35—C1—C30—C31  | 151.4 (5)  |
| C14—C15—C16—C21 | 167.8 (5)  | C38—C22—C23—C24 | -29.0 (7)  |
| C14—C15—C34—C23 | -168.7 (5) | C38—C22—C23—C34 | 151.4 (5)  |
| C14—C15—C34—C33 | 9.0 (8)    | C41—C42—C43—C44 | 178.1 (5)  |
| C15—C16—C17—C18 | -176.6 (5) | C42—C41—O1—C10  | 177.0 (5)  |
| C15—C16—C21—C20 | 176.2 (5)  | C42—C43—C44—C45 | -63.3 (8)  |
| C15—C16—C21—C22 | -4.2 (7)   | C43—C44—C45—C46 | -56.6 (9)  |
| C16—C15—C34—C23 | 12.7 (8)   | C44—C45—C46—C47 | -172.6 (7) |
| C16—C15—C34—C33 | -169.6 (5) | C45—C46—C47—C48 | -174.7 (8) |
| C16—C17—C18—C19 | 0.8 (8)    | C49—C50—C51—C52 | -69.5 (7)  |
| C16—C21—C22—C23 | 22.2 (7)   | C50—C49—O2—C13  | 178.4 (5)  |
| C16—C21—C22—C38 | -152.1 (5) | C50—C51—C52—C53 | -169.6 (5) |
| C17—C16—C21—C20 | 0.4 (7)    | C51—C52—C53—C54 | 178.2 (5)  |
| C17—C16—C21—C22 | -179.9 (5) | C52—C53—C54—C55 | -177.3 (5) |
| C17—C18—C19—C20 | -0.5 (8)   | C53—C54—C55—C56 | 178.2 (5)  |
| C18—C19—C20—C21 | 0.1 (8)    | O1—C10—C11—C12  | 15.1 (8)   |
| C19—C20—C21—C16 | -0.1 (8)   | O1—C10—C11—C32  | -161.7 (5) |
| C19—C20—C21—C22 | -179.7 (5) | O1—C41—C42—C43  | 172.8 (5)  |
| C20—C21—C22—C23 | -158.1 (5) | O2—C13—C14—C15  | 172.4 (5)  |
| C20—C21—C22—C38 | 27.6 (8)   | O2—C49—C50—C51  | 179.9 (5)  |

Document origin: *publCIF* [Westrip, S. P. (2010). *J. Apply. Cryst.*, **43**, 920-925].



## 4 OFET Plots

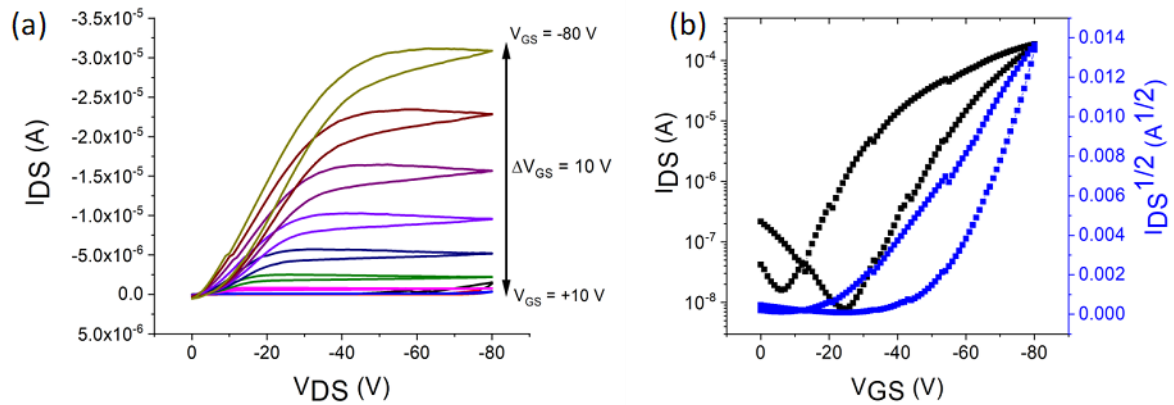

**Figure S4:** (a) Output and (b) transfer characteristics ( $V_{DS} = -70$  V) of OFET fabricated using **3b** layer. Channel width = 1 cm, channel length = 20  $\mu\text{m}$

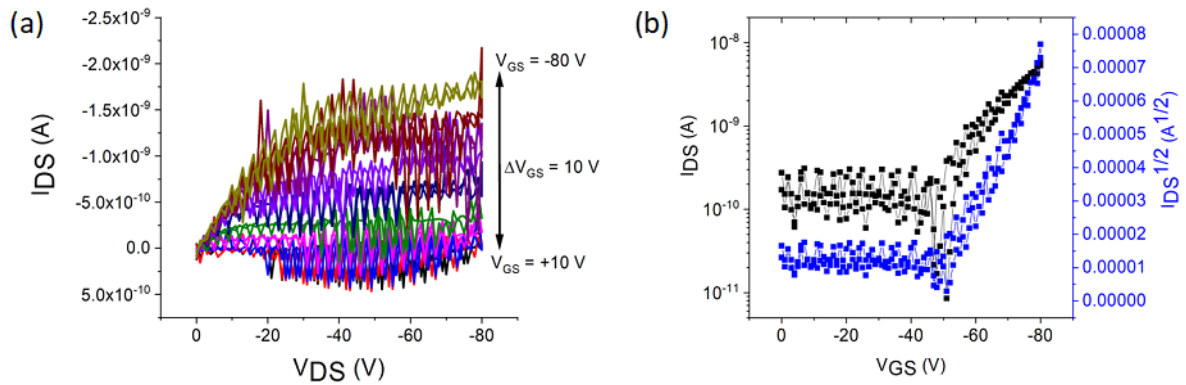

**Figure S5:** (a) Output and (b) transfer characteristics ( $V_{DS} = -70$  V) of OFET fabricated using **2b** layer. Channel width = 1 cm, channel length = 10  $\mu\text{m}$ .

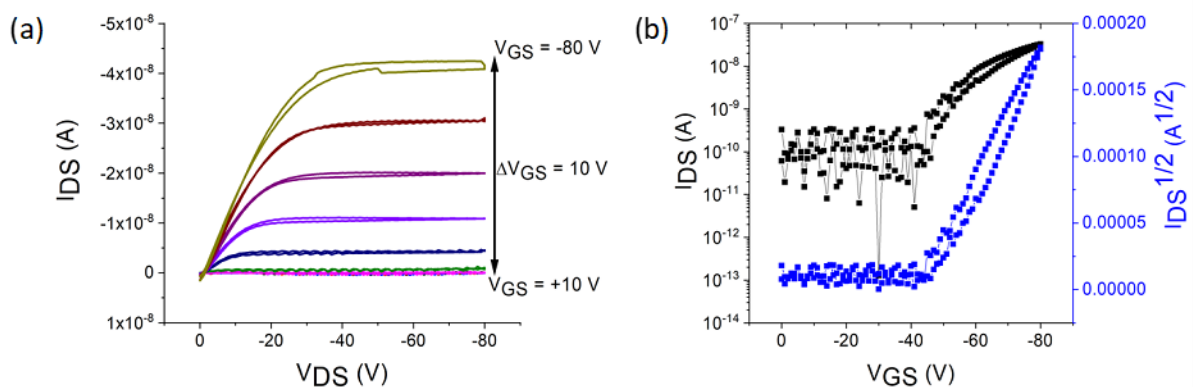

**Figure S6:** (a) Output and (b) transfer characteristics ( $V_{DS} = -70$  V) of OFET fabricated using **2a** layer. Channel width = 1 cm, channel length = 20  $\mu\text{m}$

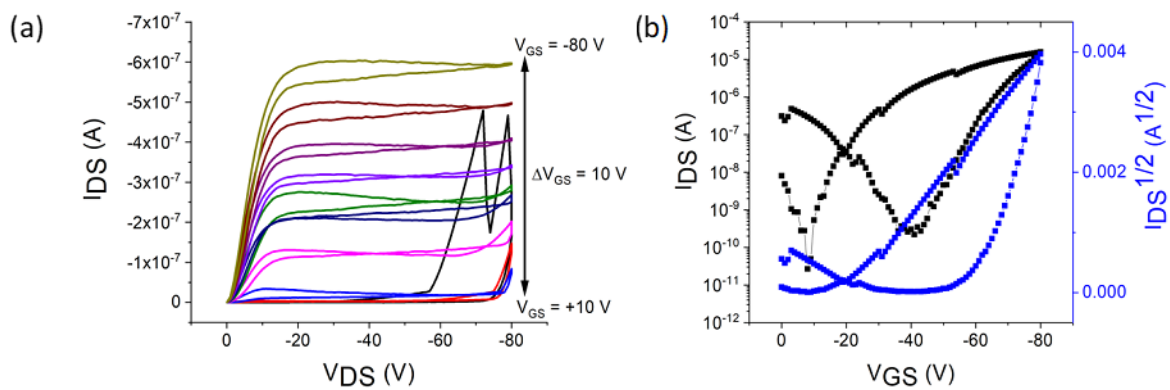

**Figure S7:** (a) Output and (b) transfer characteristics ( $V_{DS} = -70$  V) of OFET fabricated using **3c** layer. Channel width = 1 cm, channel length = 20  $\mu$ m

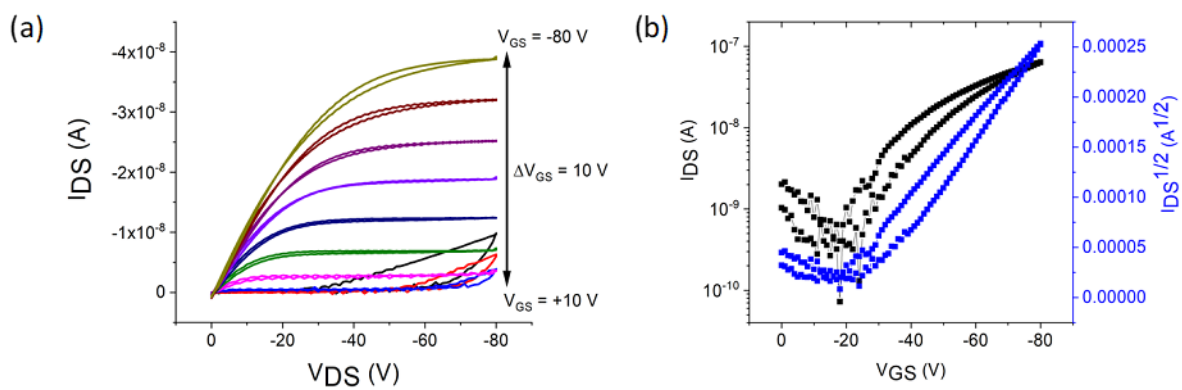

**Figure S8:** (a) Output and (b) transfer characteristics ( $V_{DS} = -70$  V) of OFET fabricated using **3a** layer. Channel width = 1 cm, channel length = 20  $\mu$ m
